# Supplementary material for: Heterobimetallic dinuclear lanthanide alkoxide complexes as acid–base bifunctional catalysts for synthesis of carbamates under solvent-free conditions
Source: Royal Society of Chemistry journal article supplement (doi:10.1039/c6ra15160d), 2016-01-01

## **Supplementary Information**

### **Heterobimetallic Dinuclear Lanthanide Alkoxide Complexes as Acid–Base Bifunctional Catalysts for Synthesis of Carbamates under Solvent-Free Conditions**

Ruijie Zeng,<sup>†</sup> Linquan Bao,<sup>†</sup> Hongting Sheng,<sup>\*</sup> Lili Sun, Man Chen, Yan Feng<sup>\*</sup> and

Manzhou Zhu

School of Chemistry and Chemical Engineering & Center for Atomic Engineering of  
Advanced Materials, Anhui University, Hefei 230039, P. R. China

\*Email: sht\_anda@126.com (Hongting Sheng), fy70@163.com (Yan Feng)

<sup>†</sup> Both authors contributed equally to this work.

## Contents

### Copies of $^1\text{H}$ and $^{13}\text{C}$ NMR Spectra

S2-S30

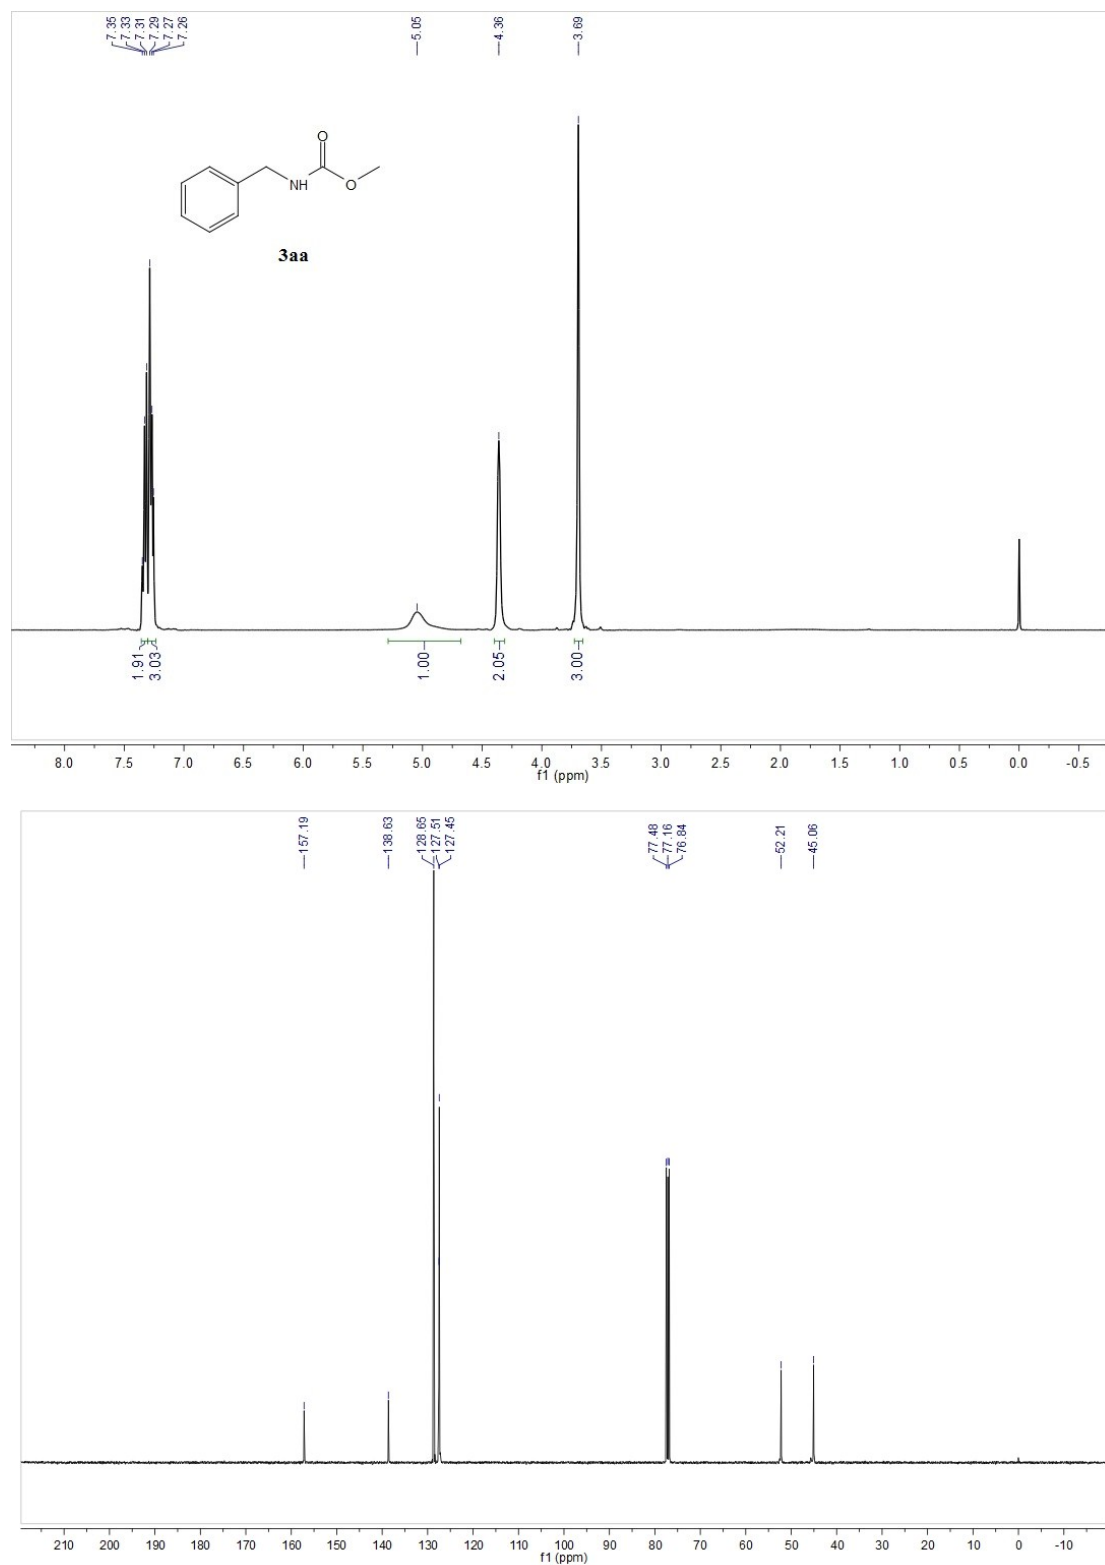

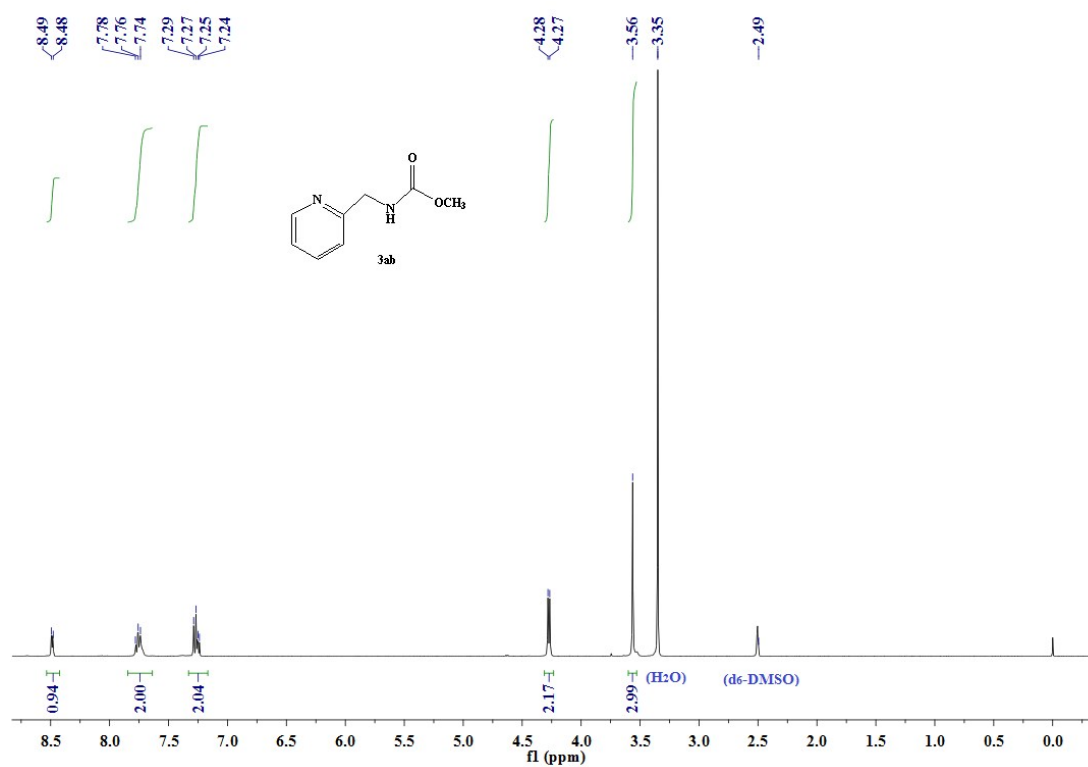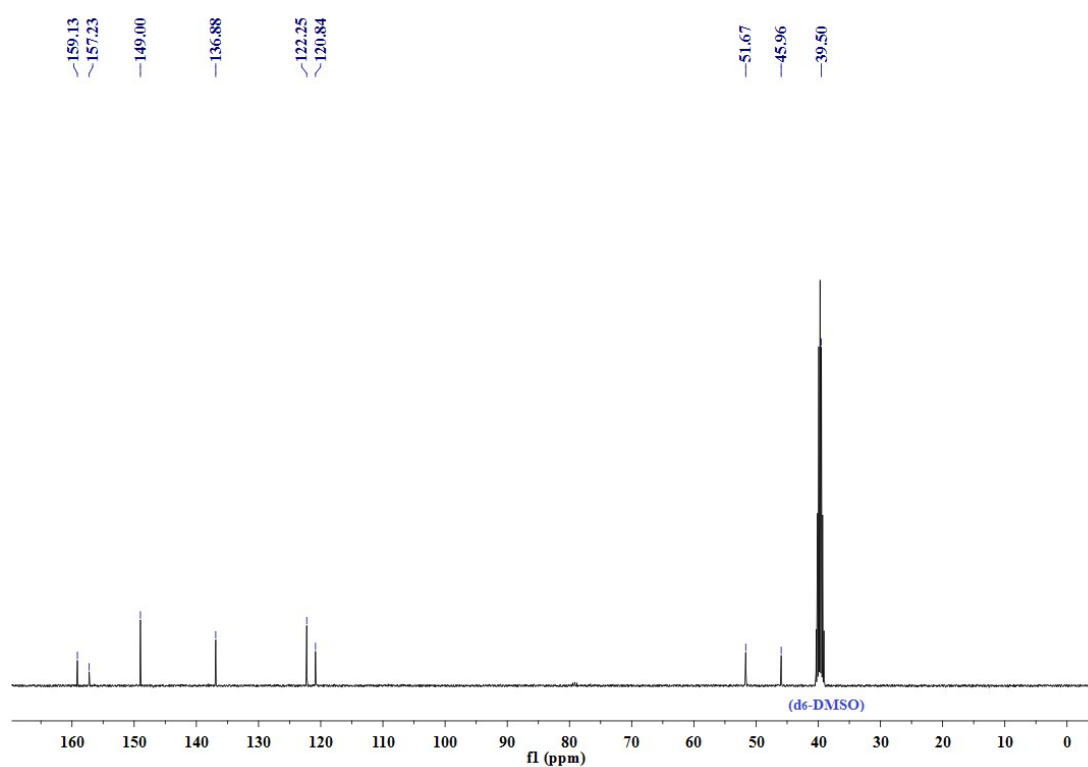

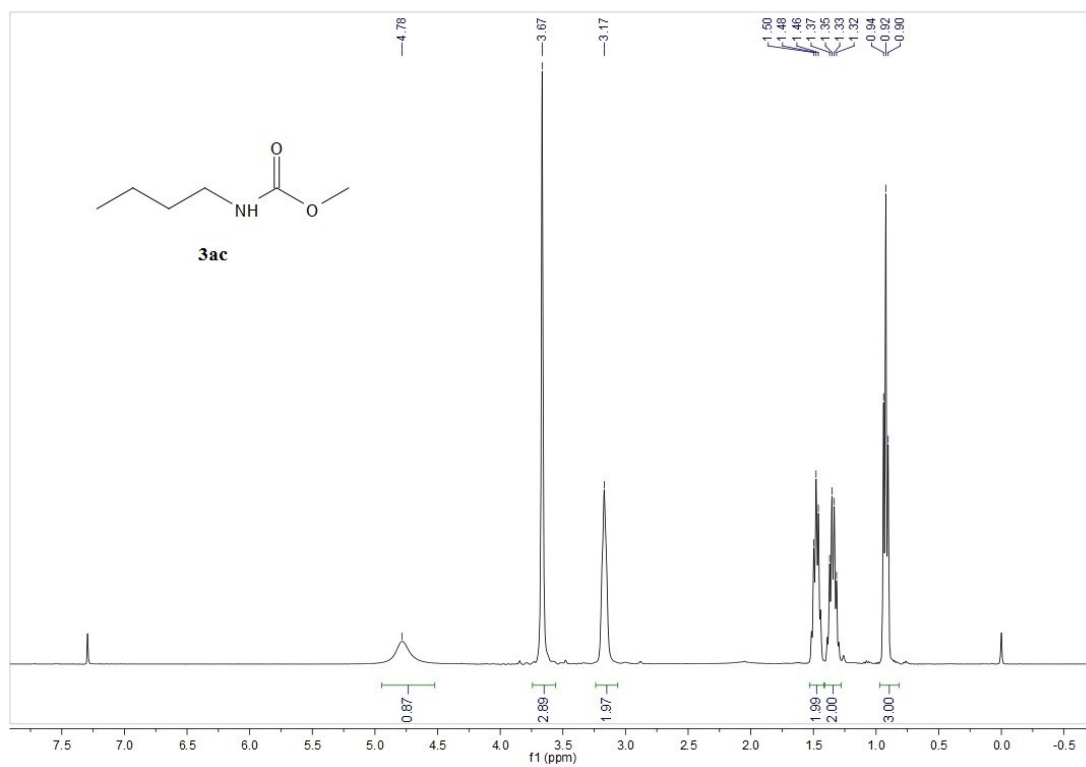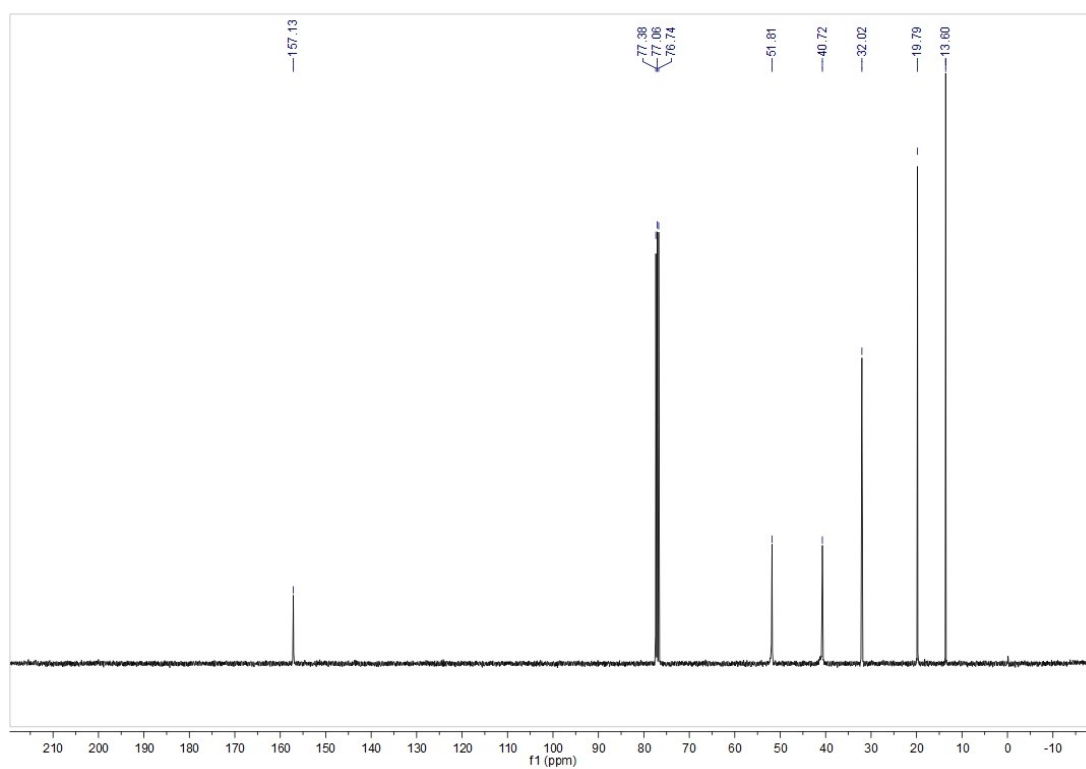

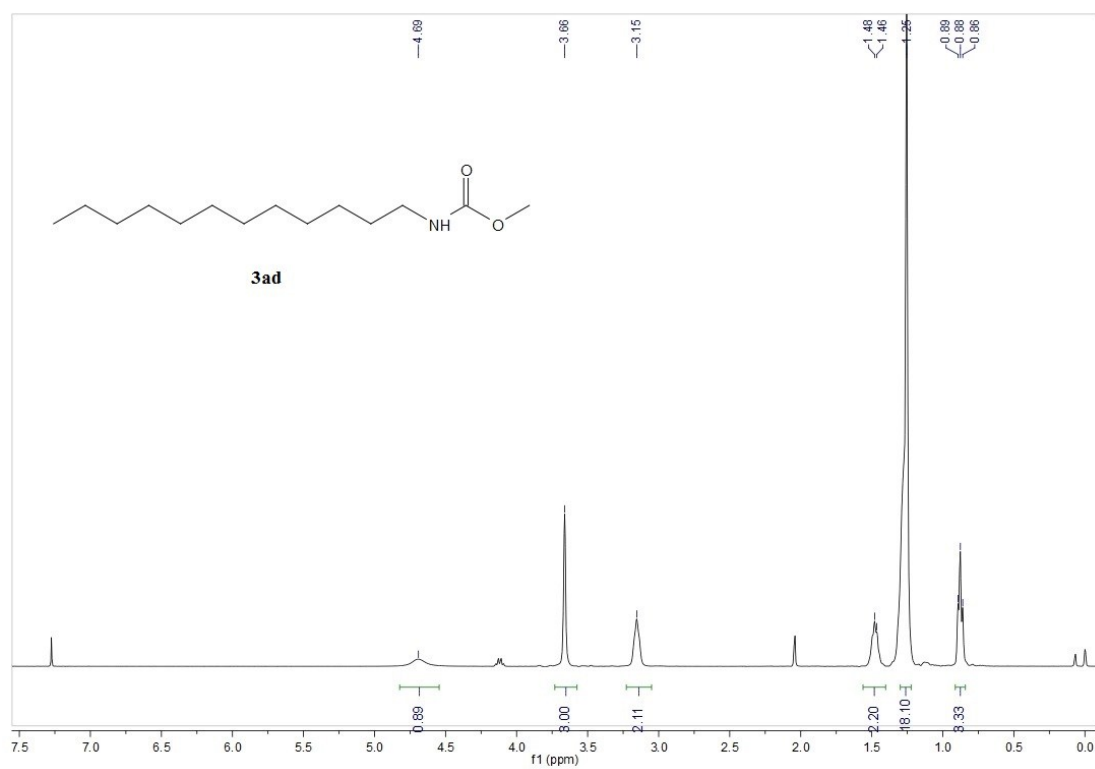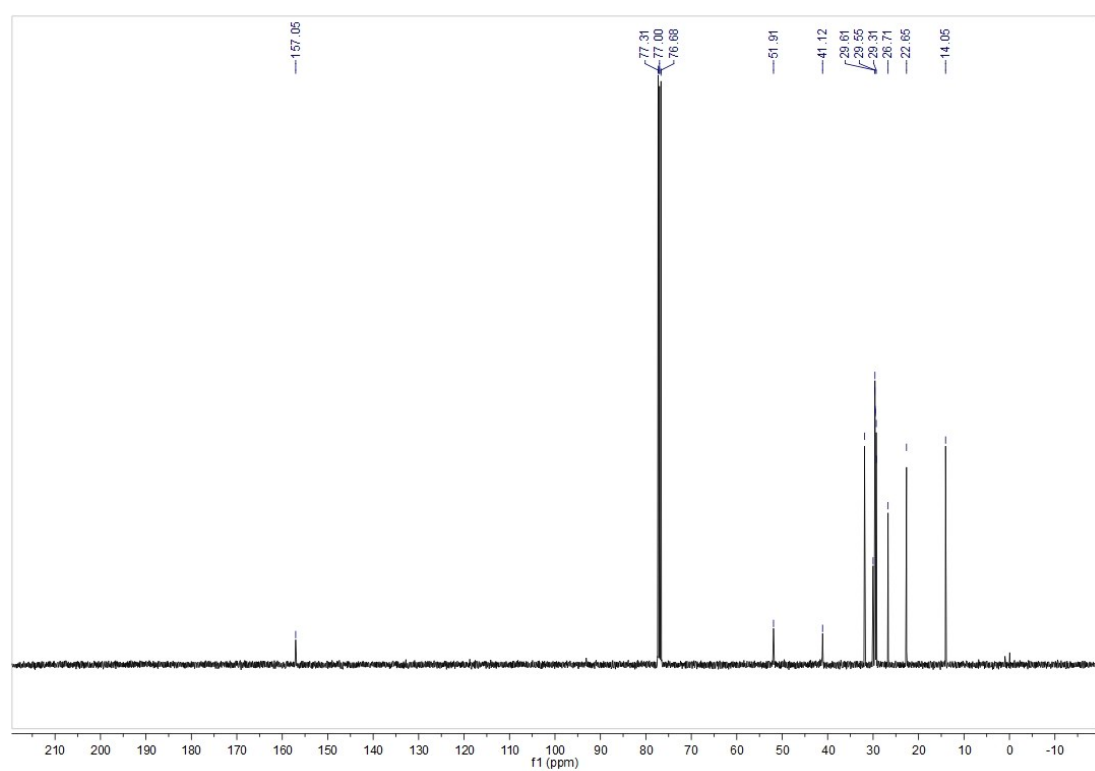

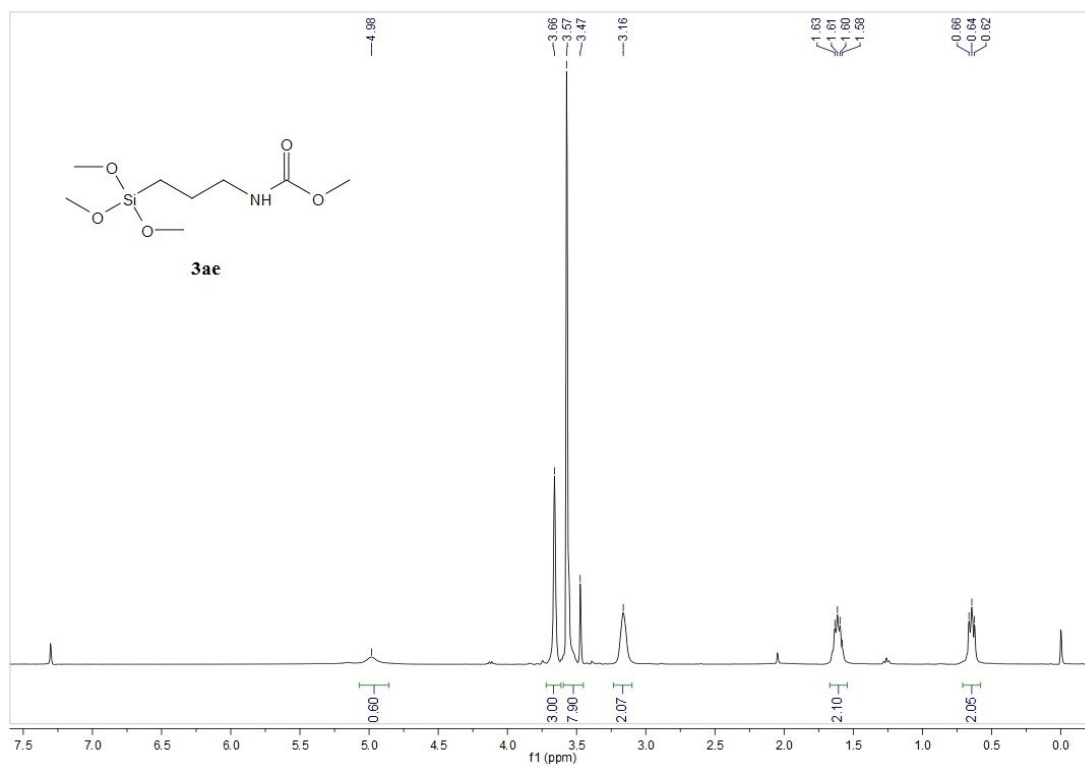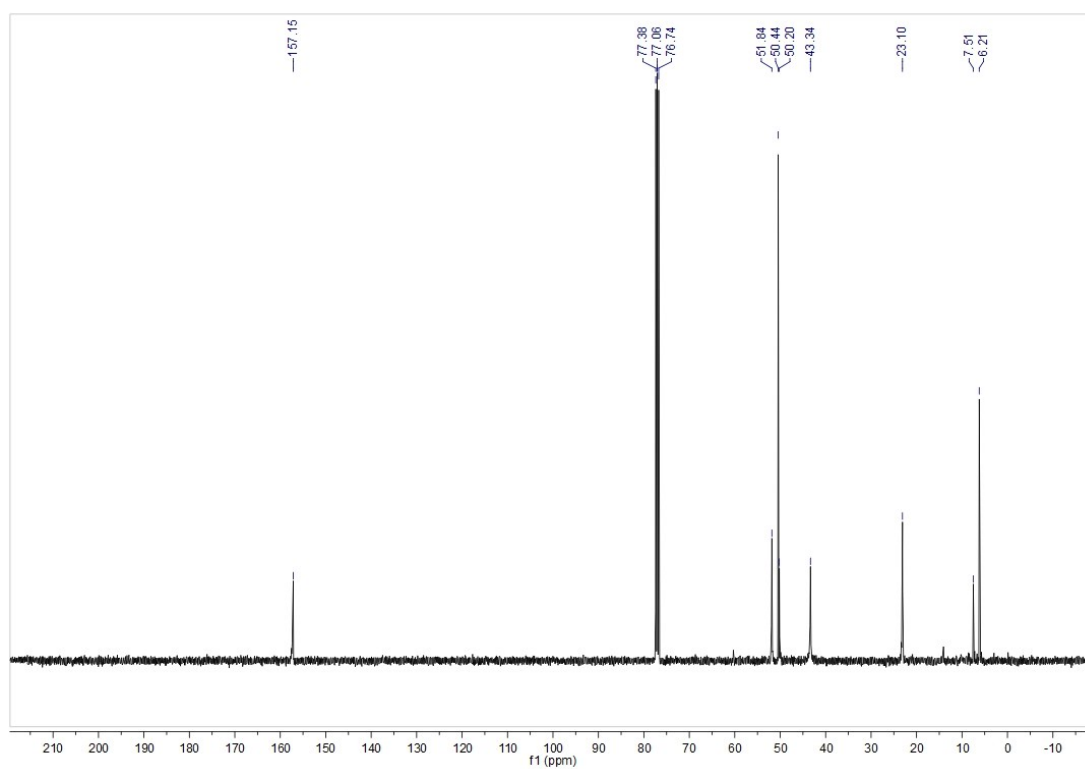

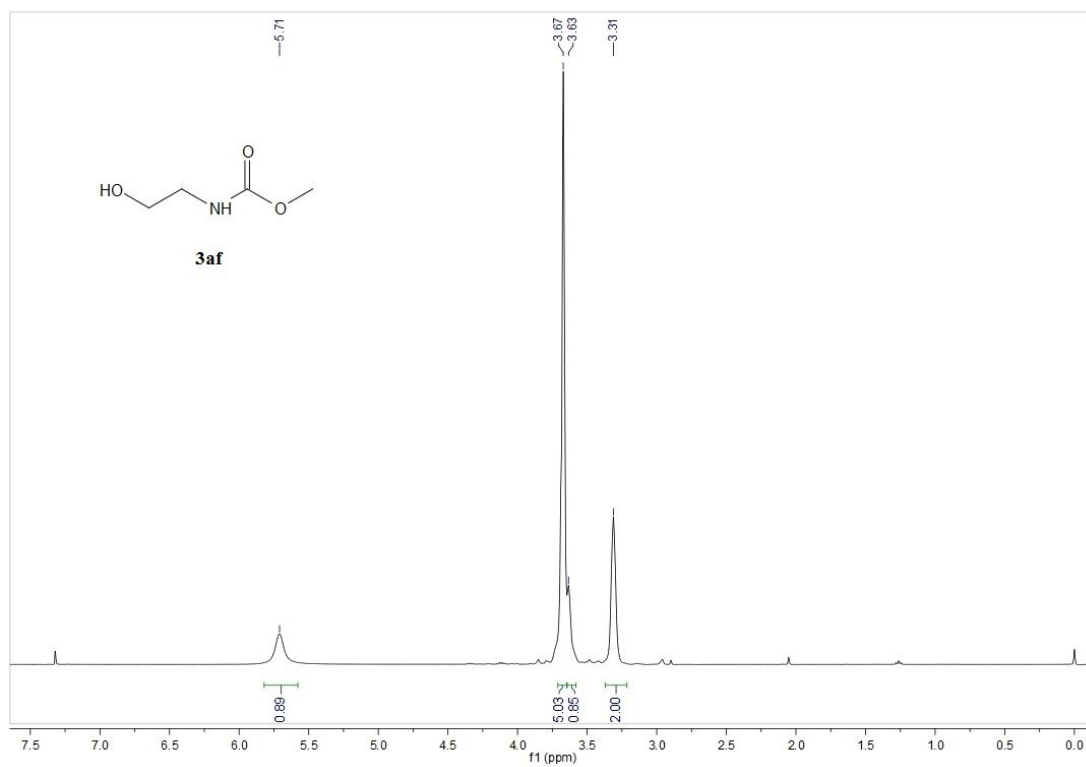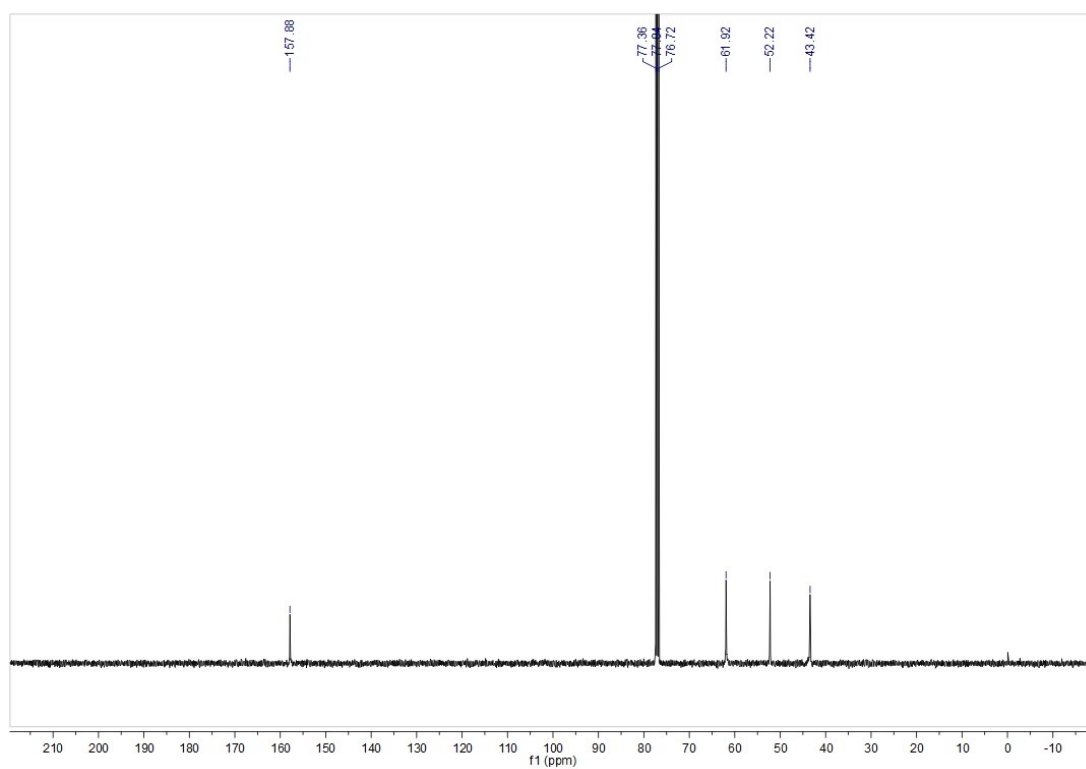

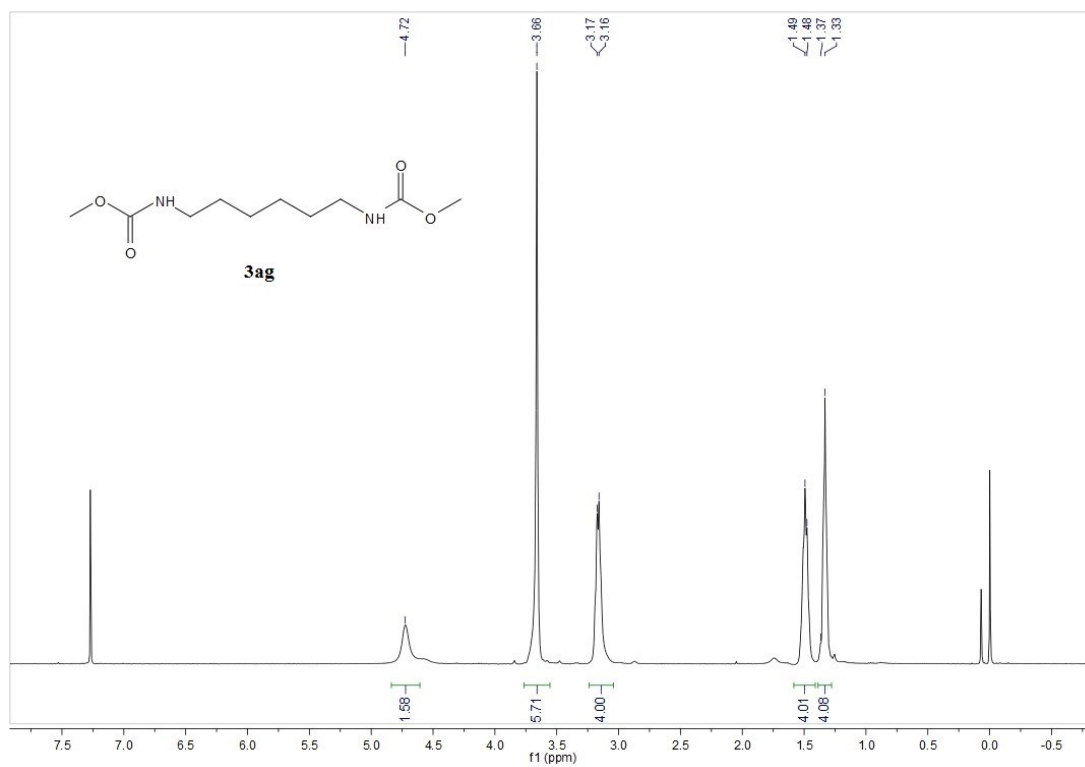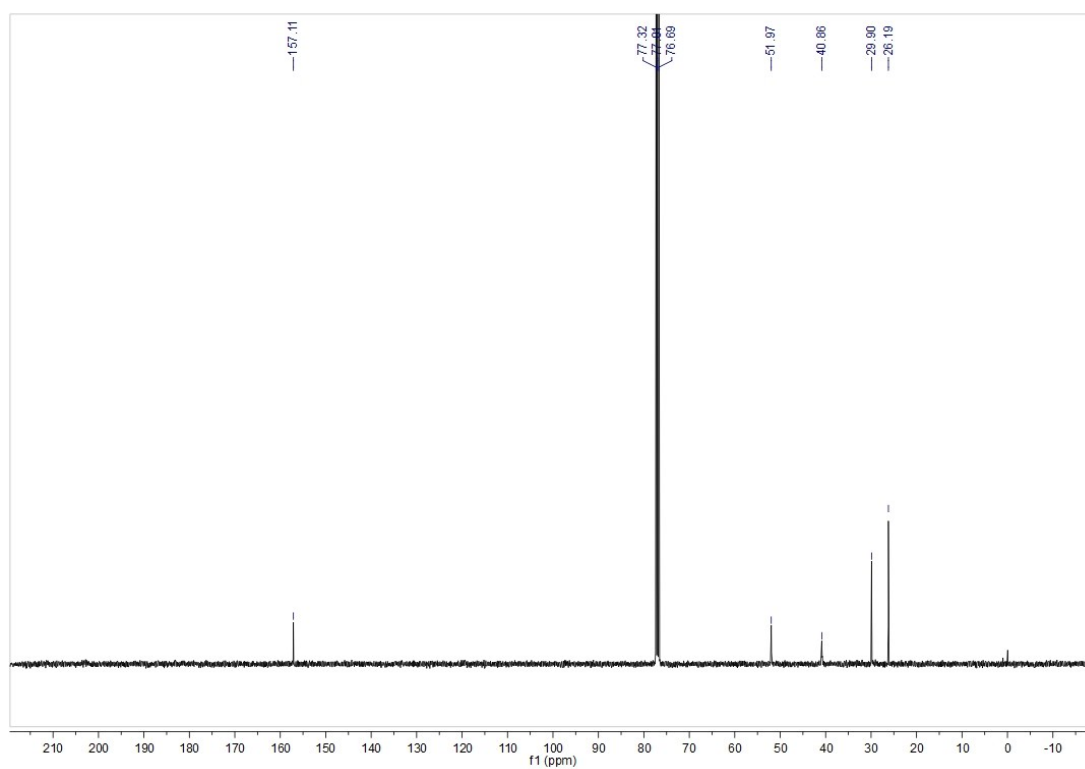



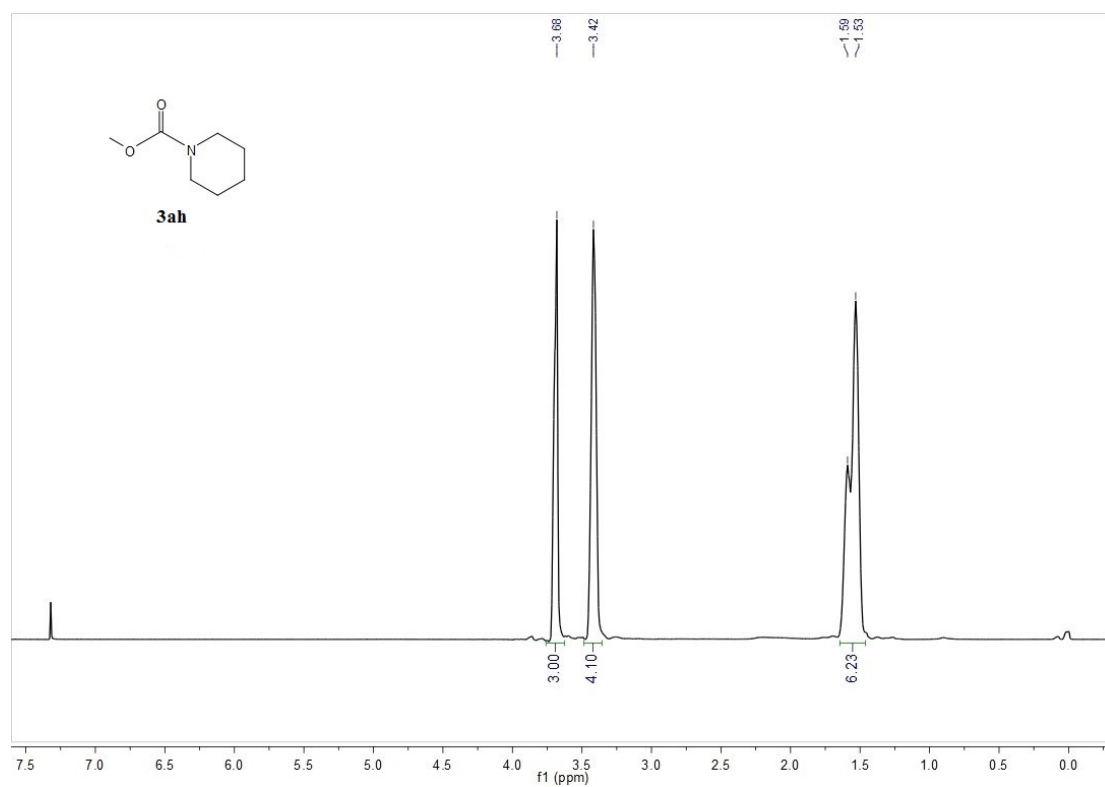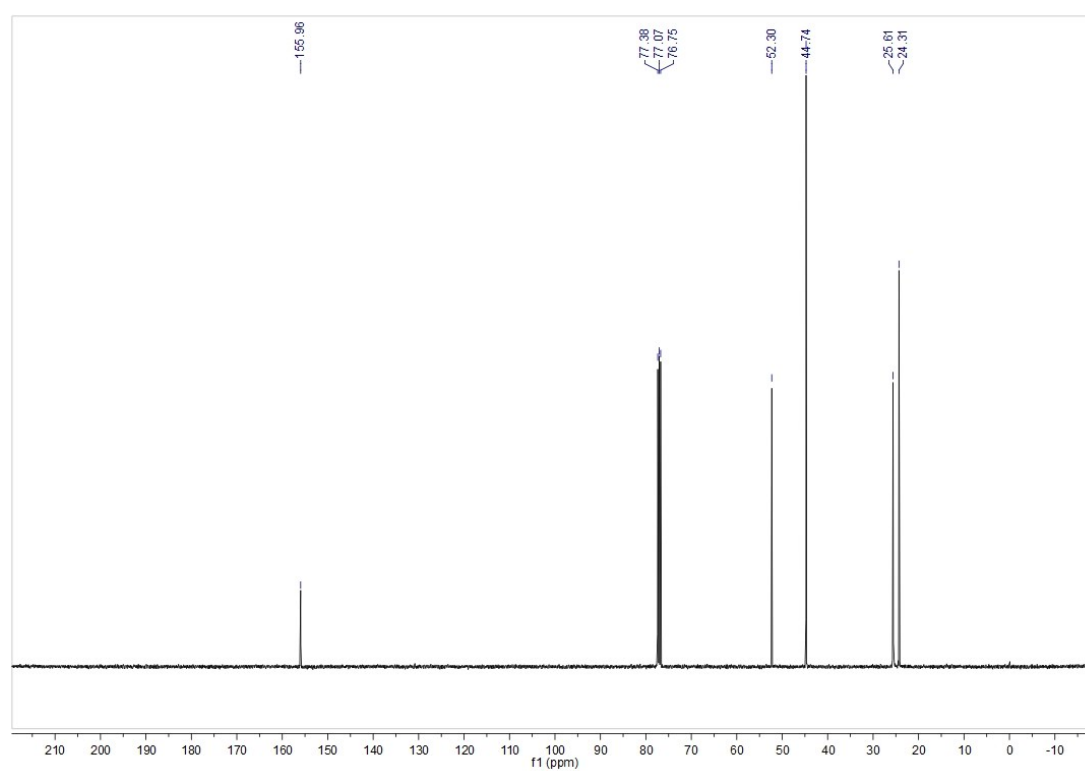

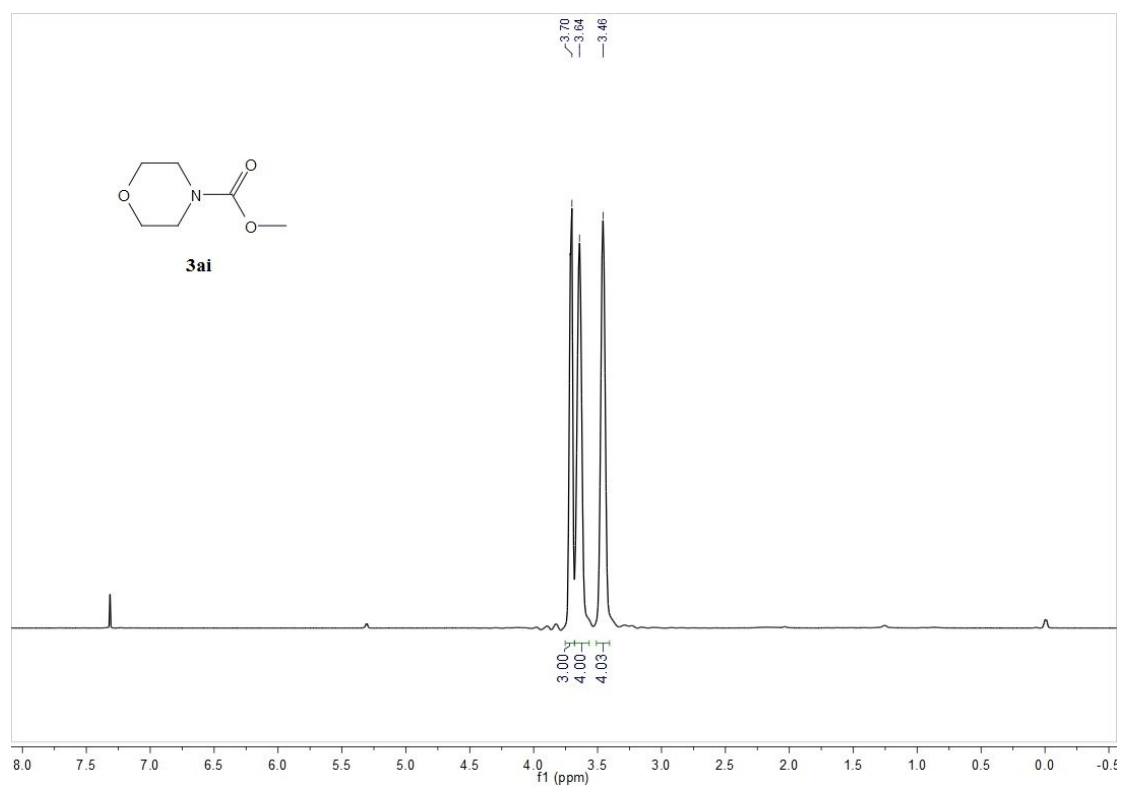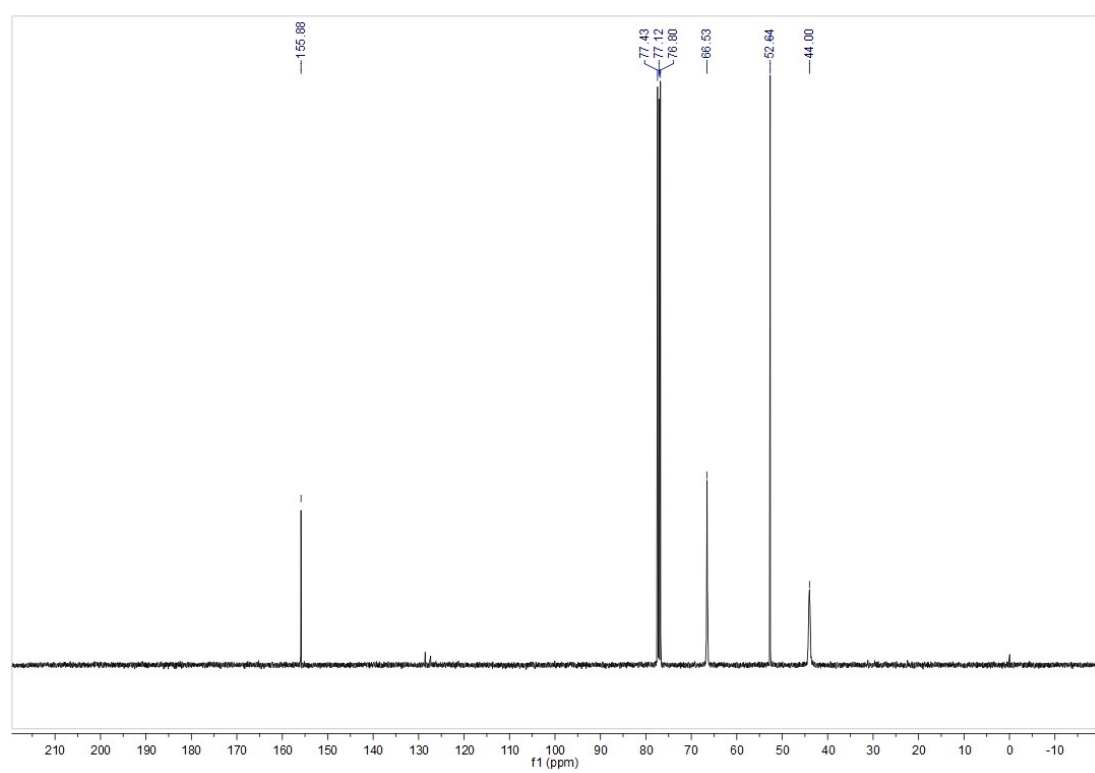

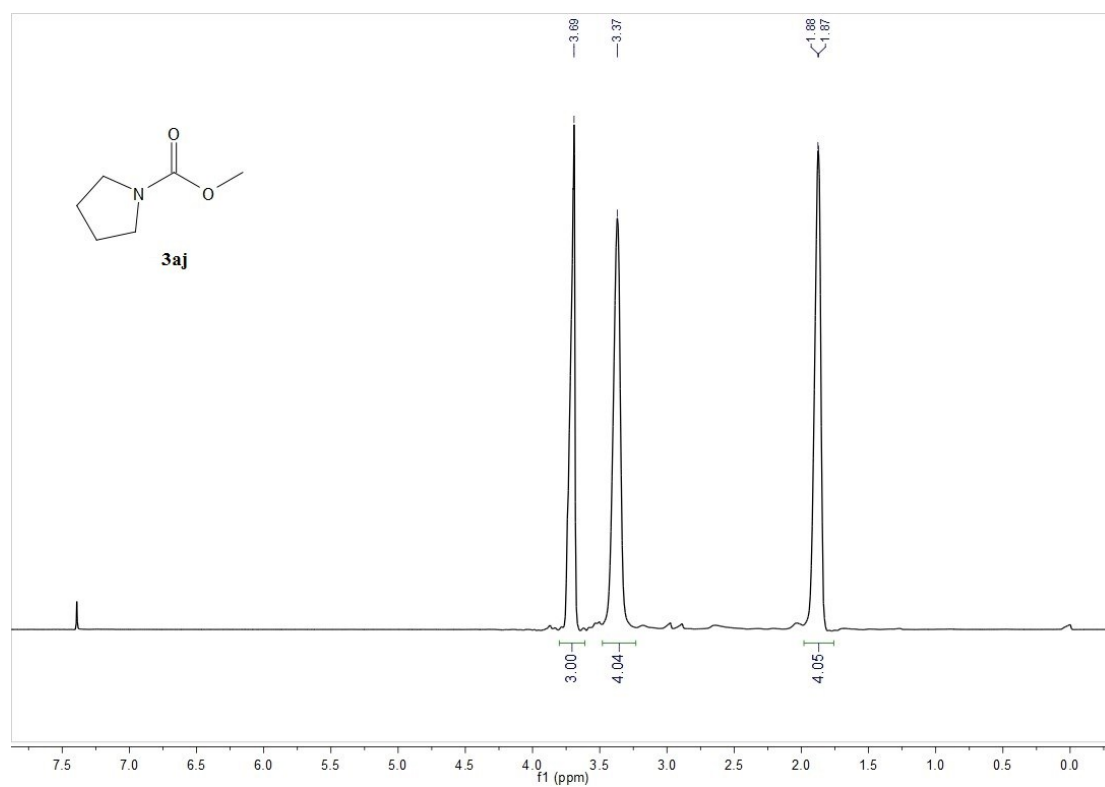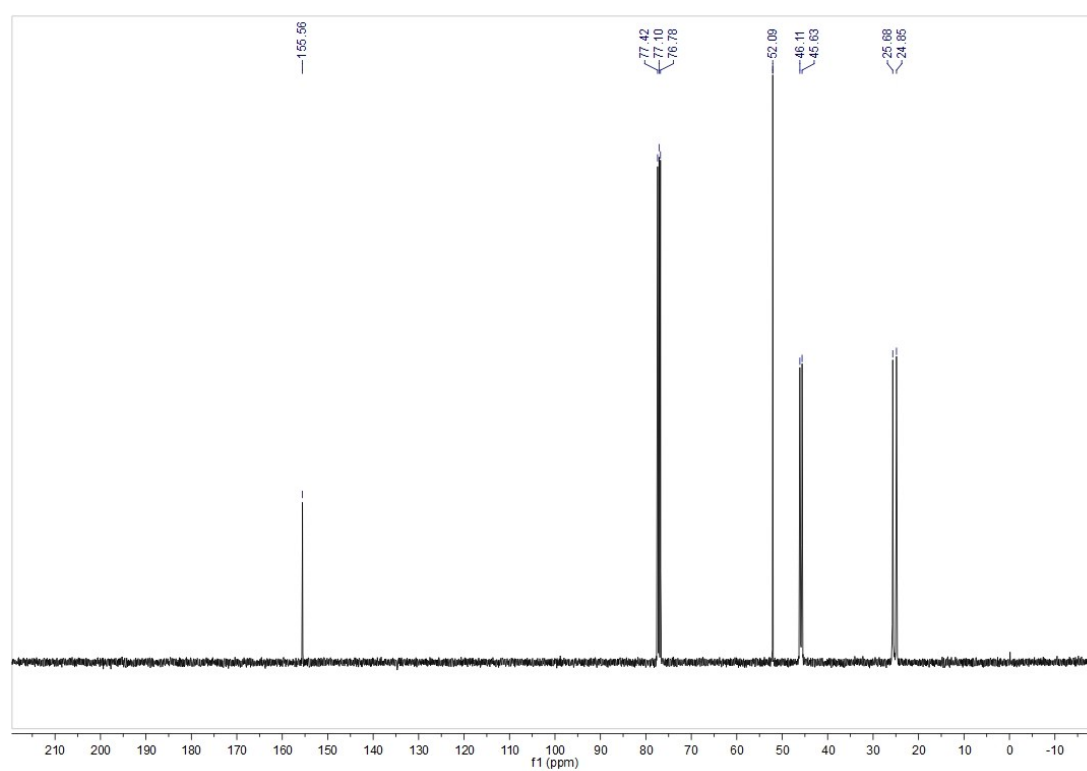

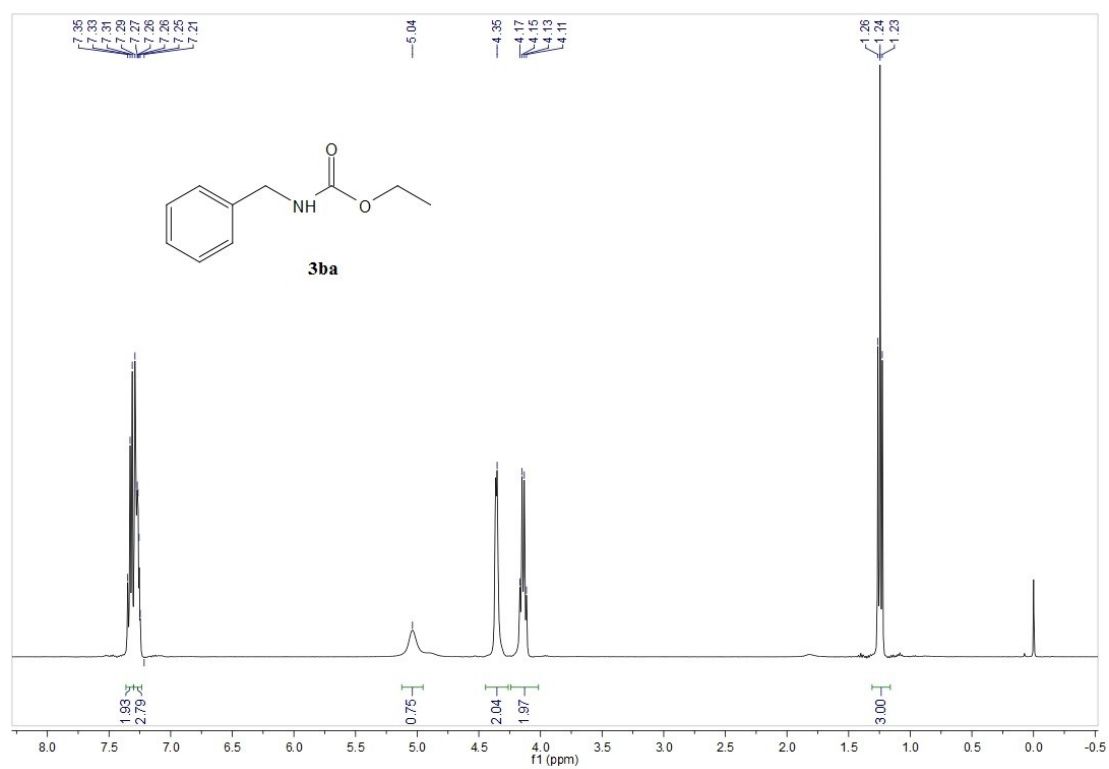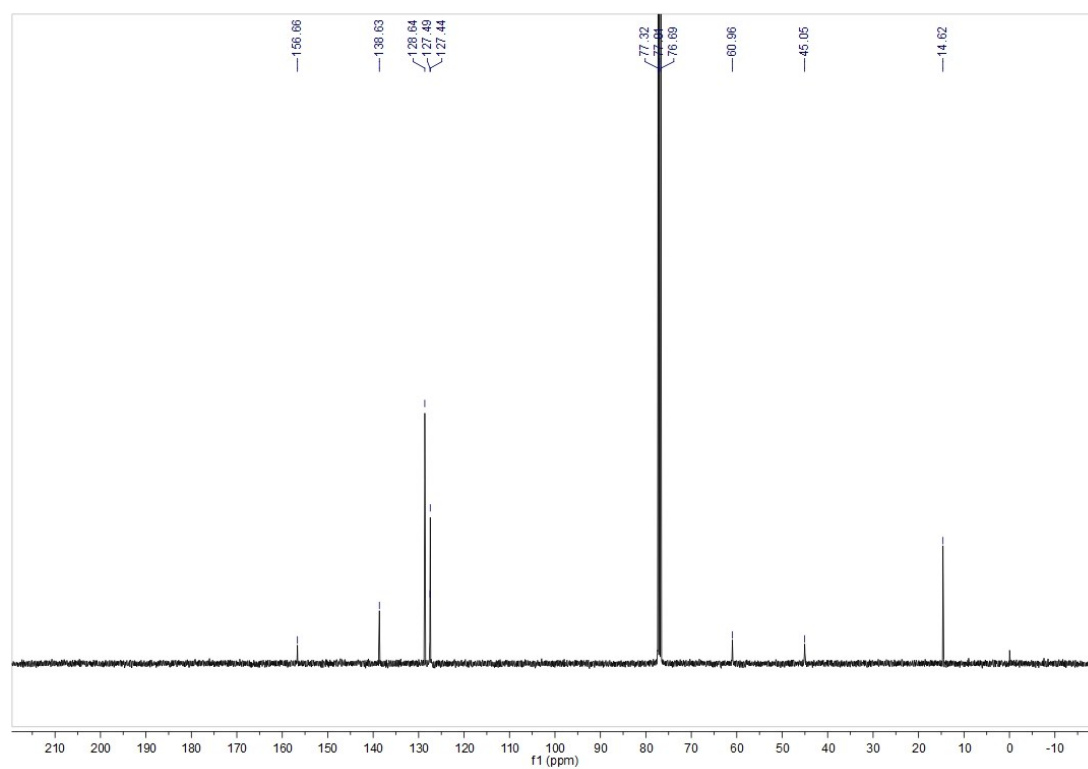

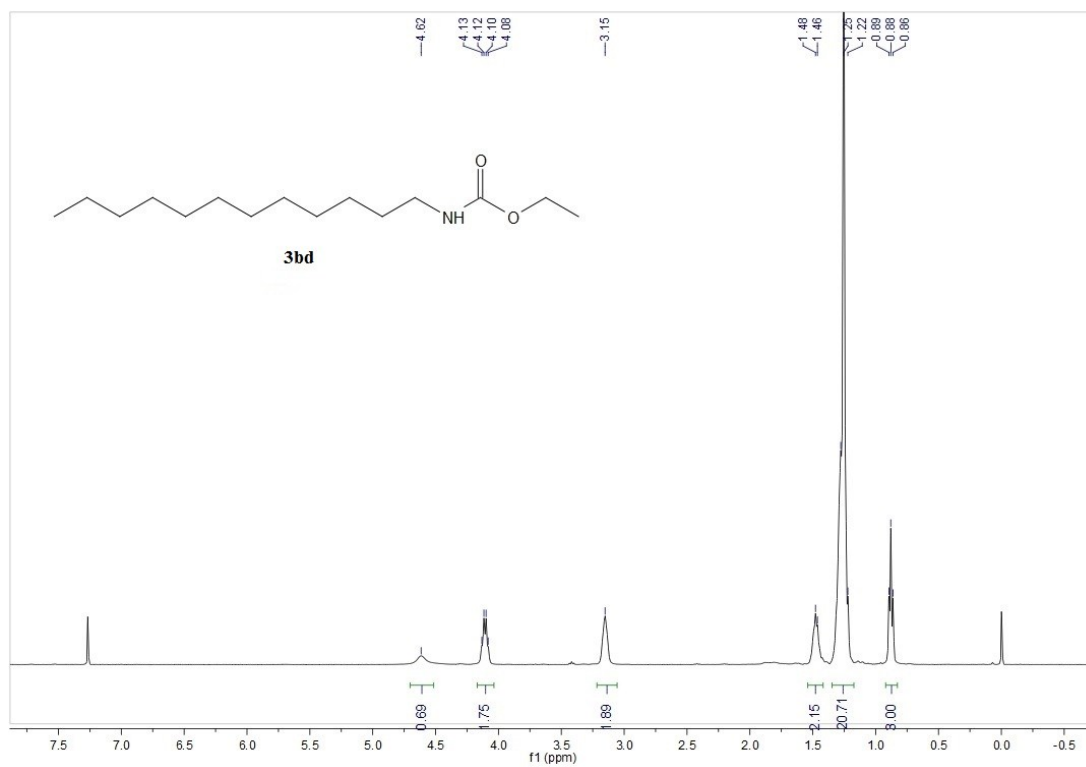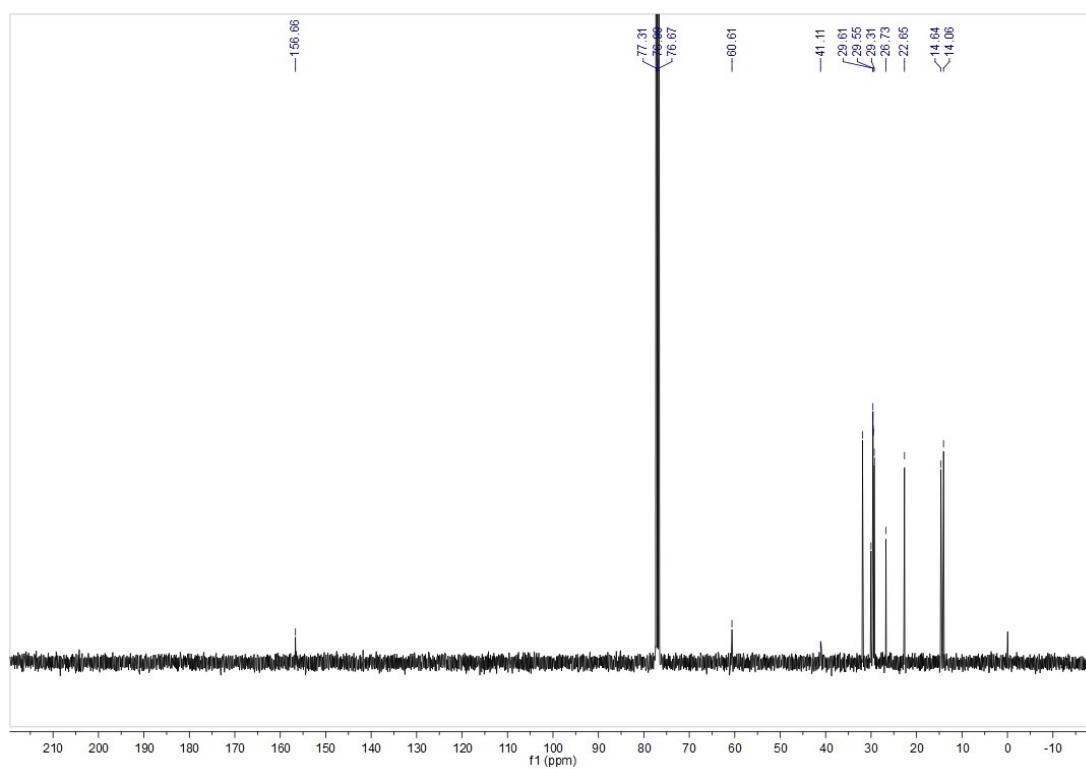

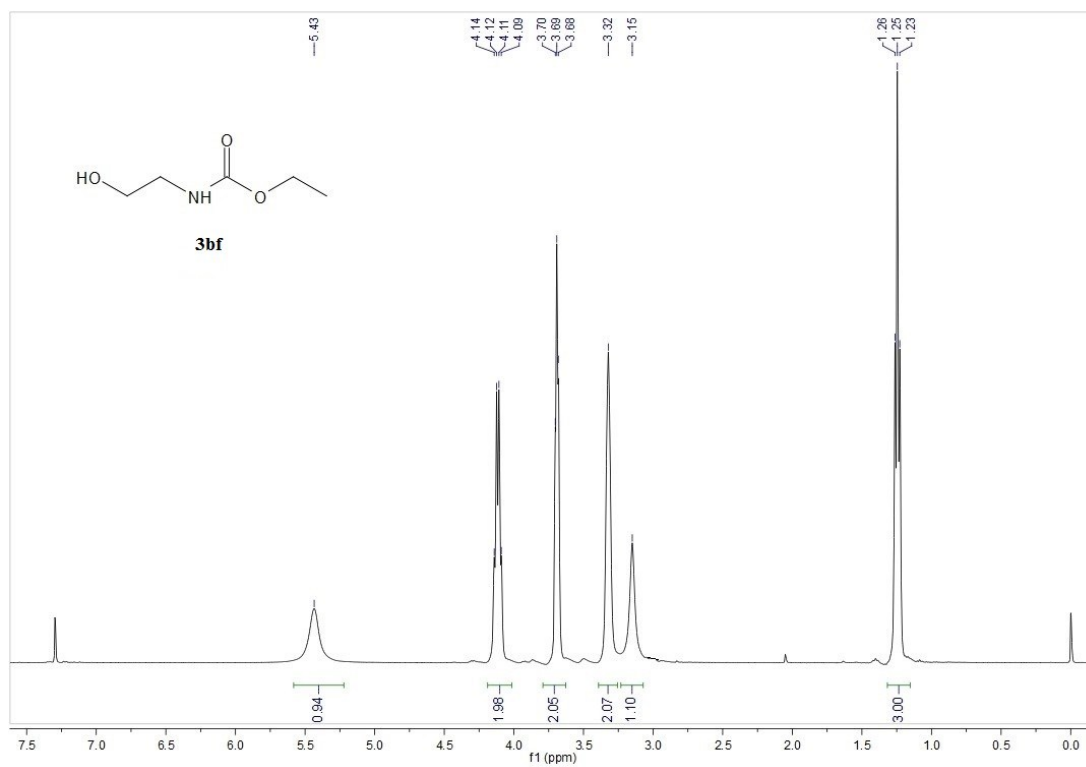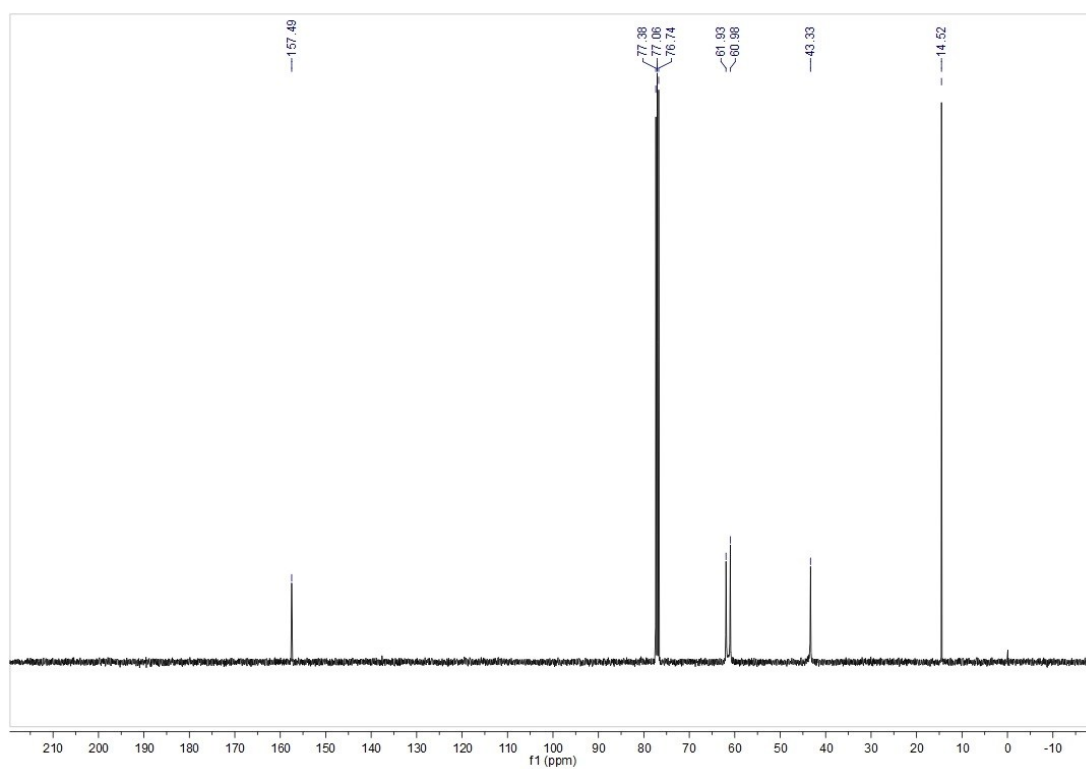

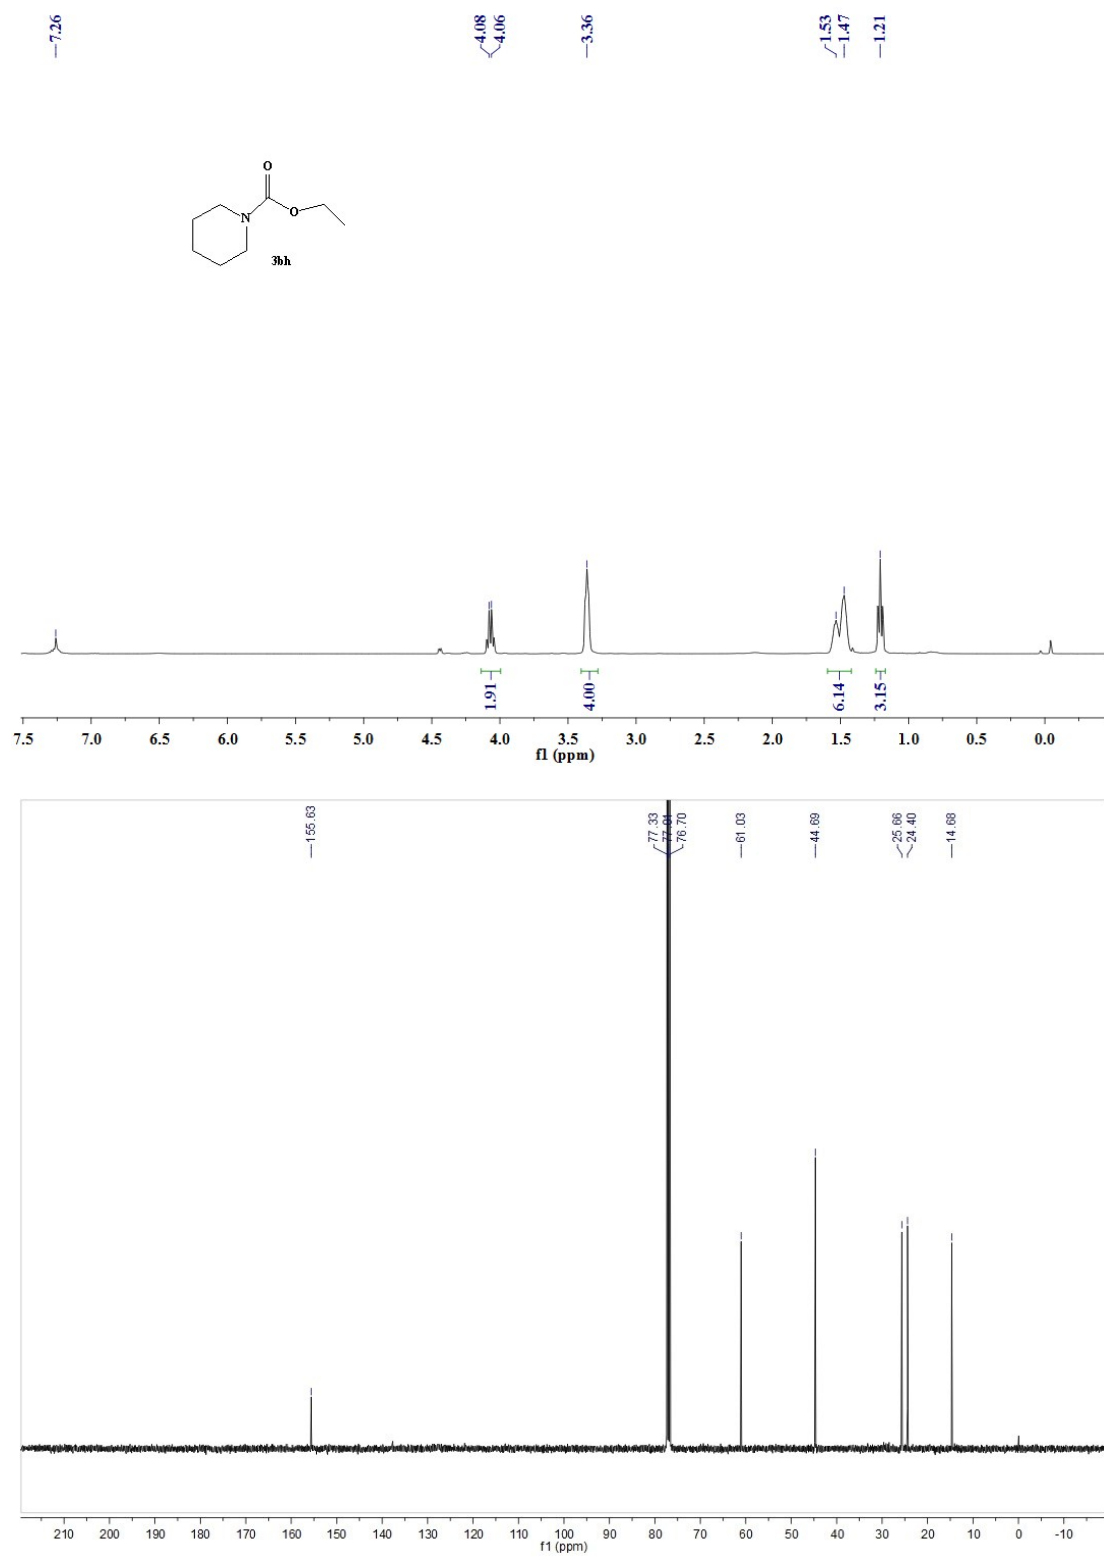

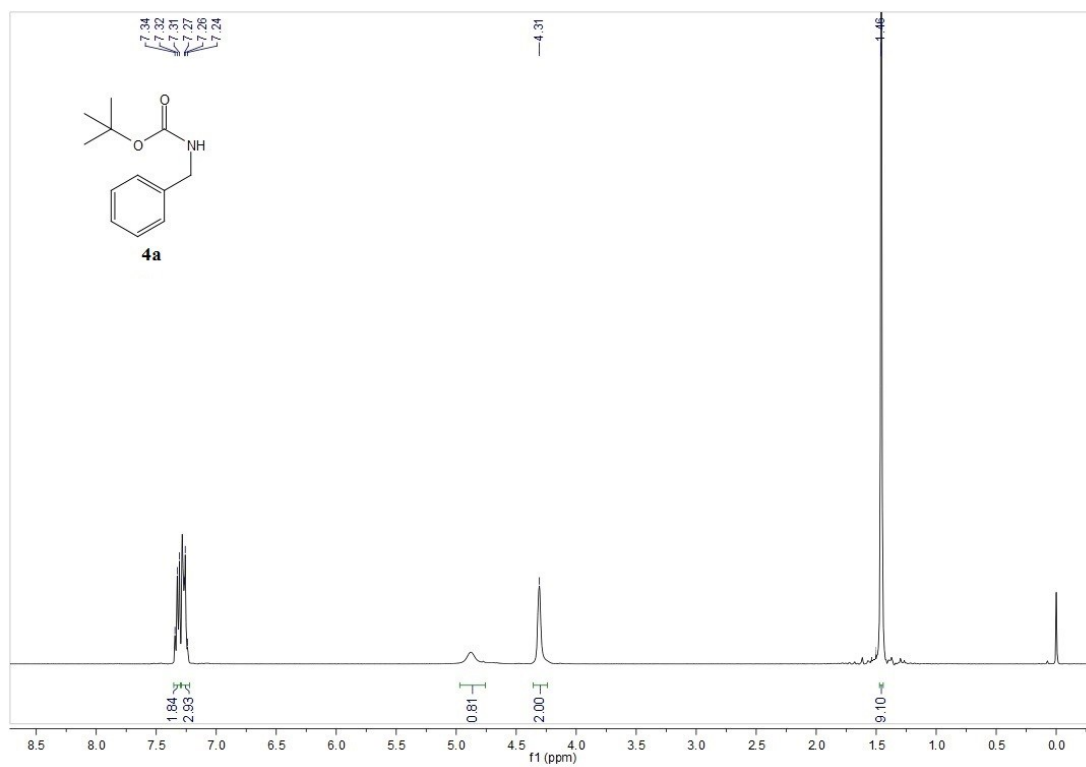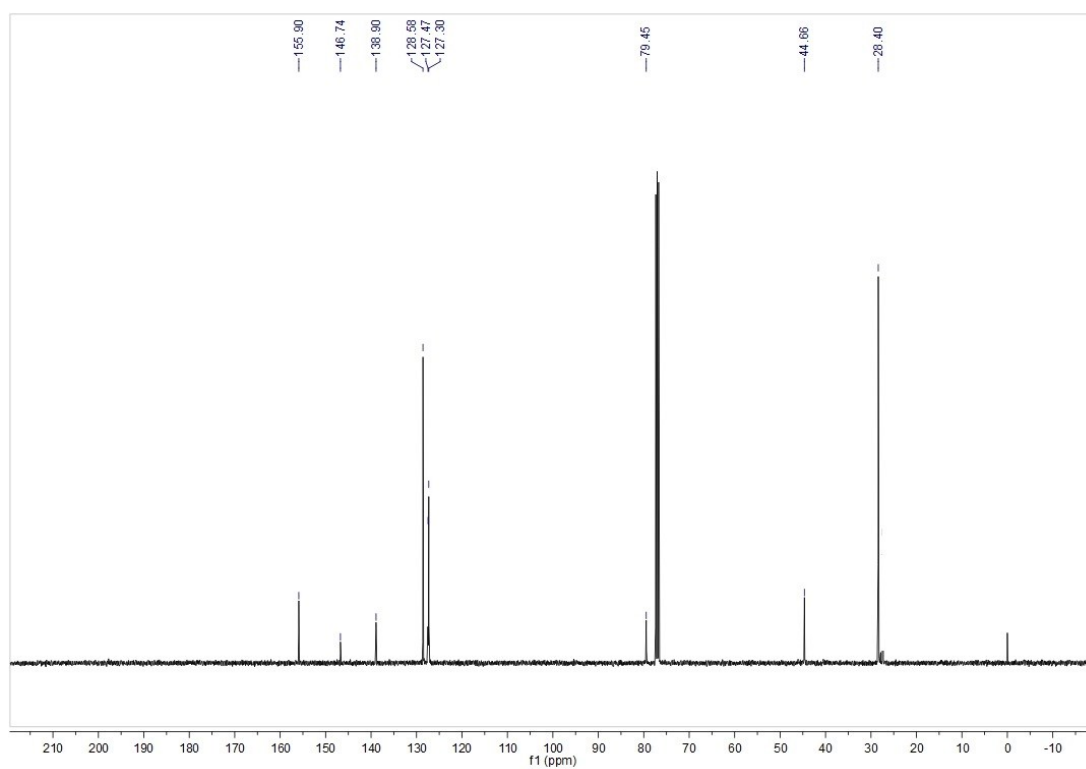



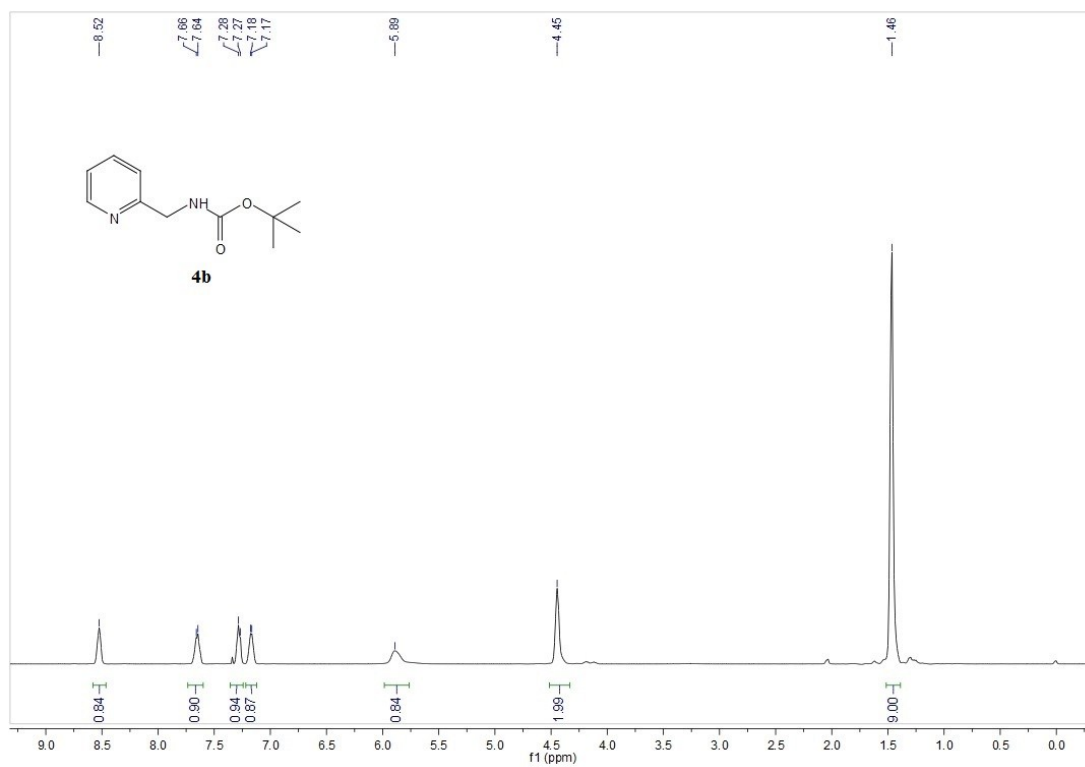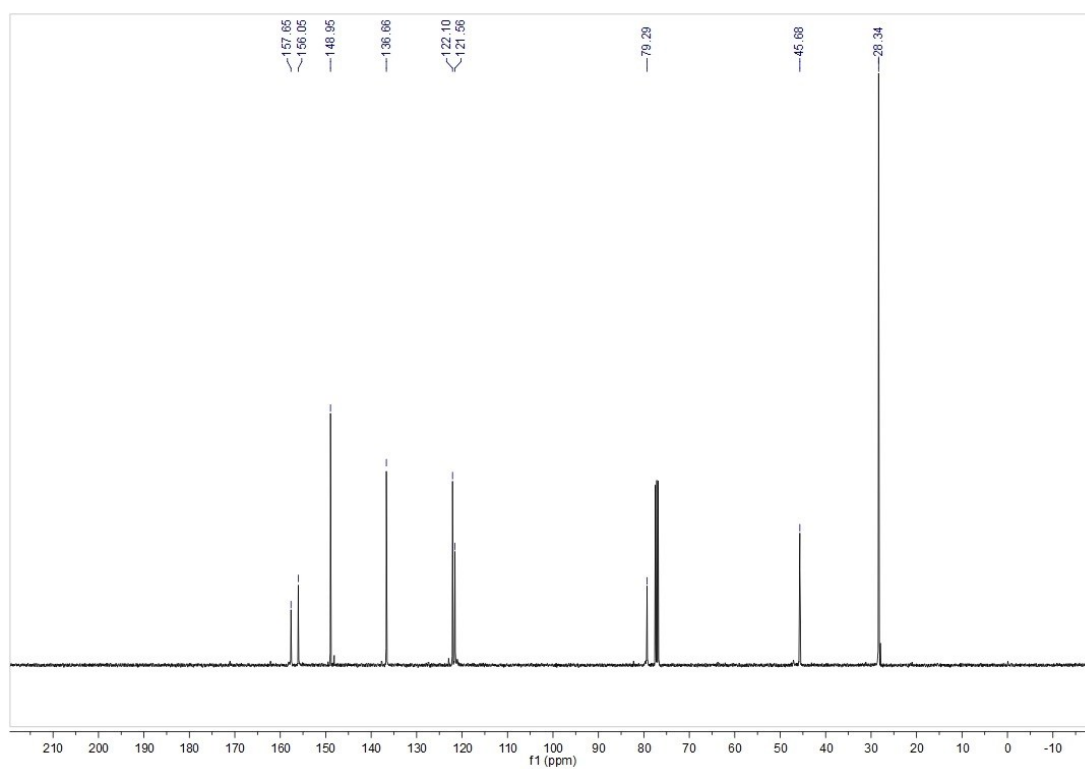

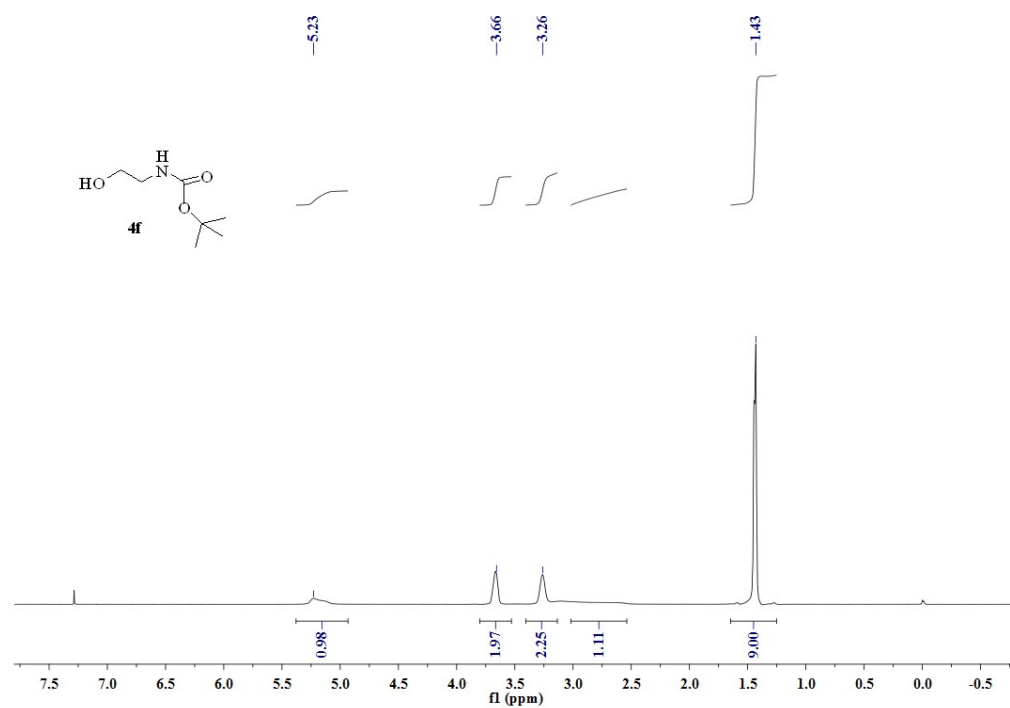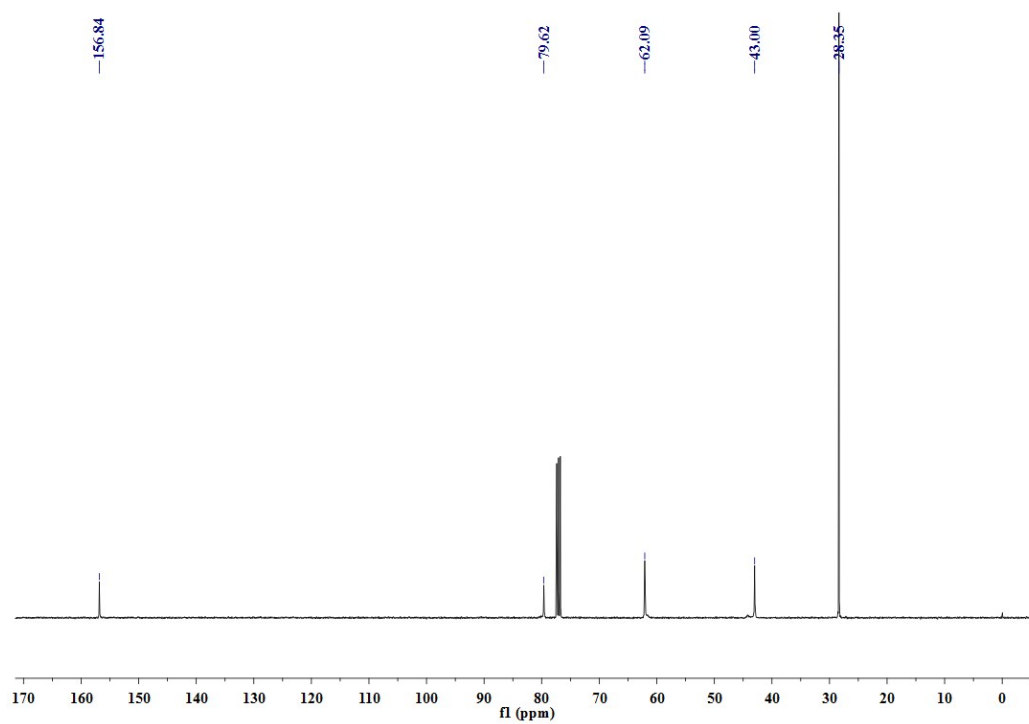

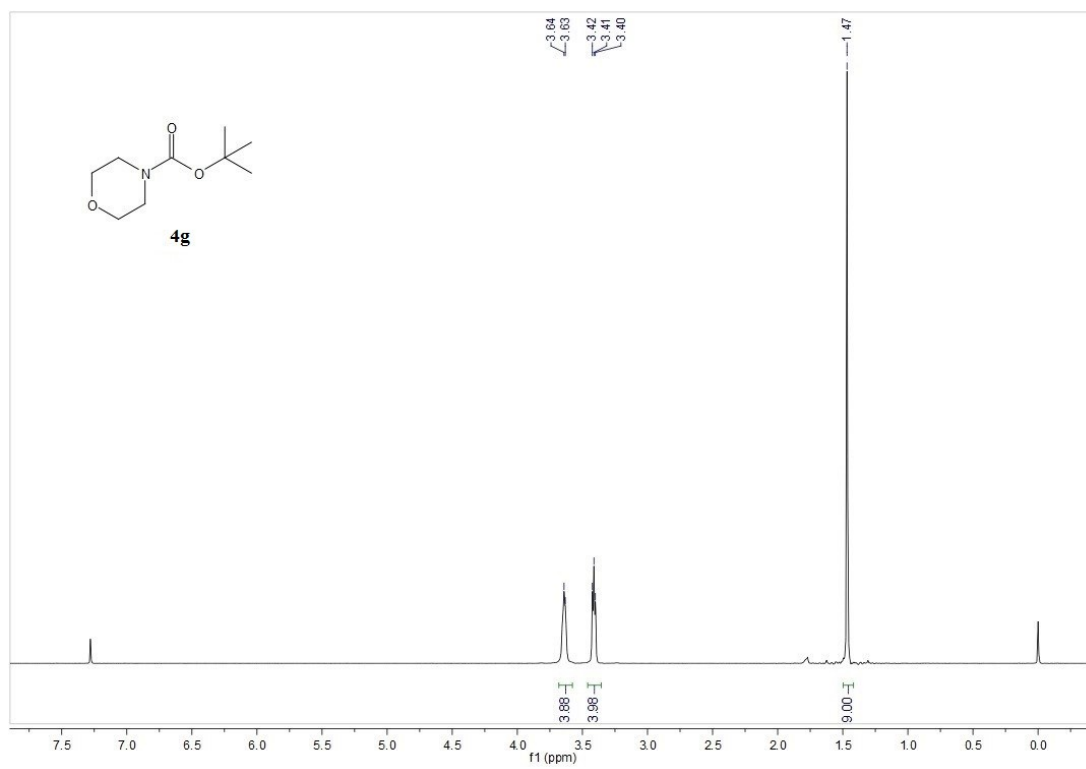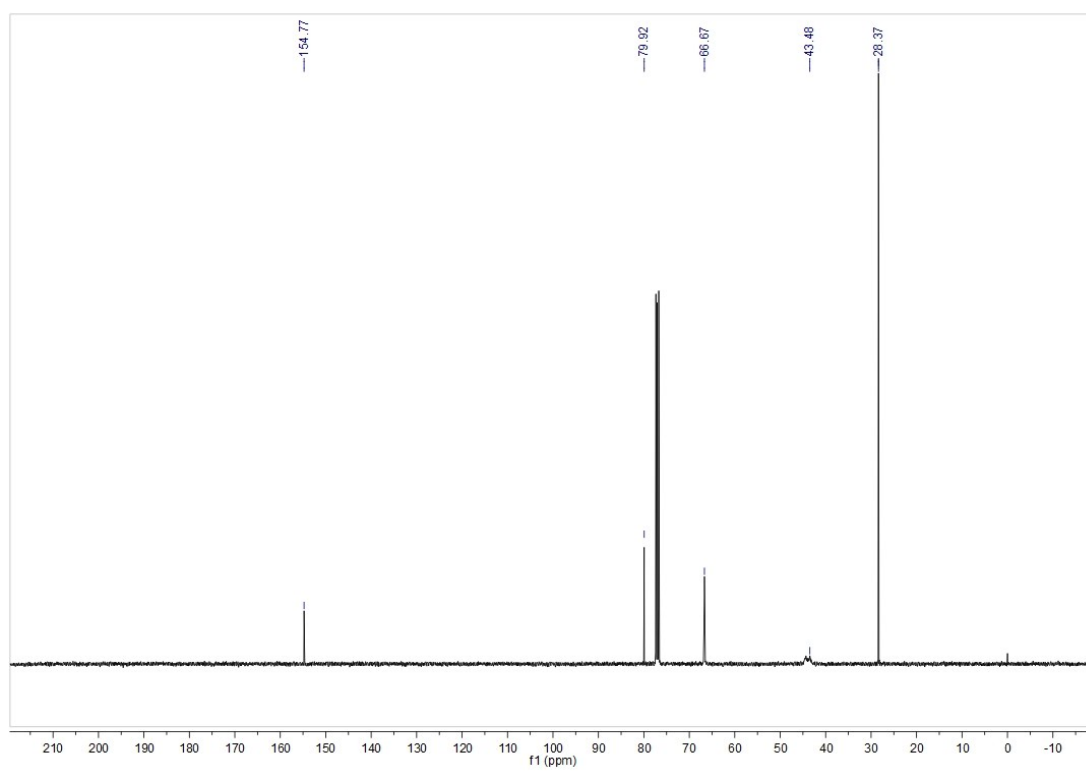

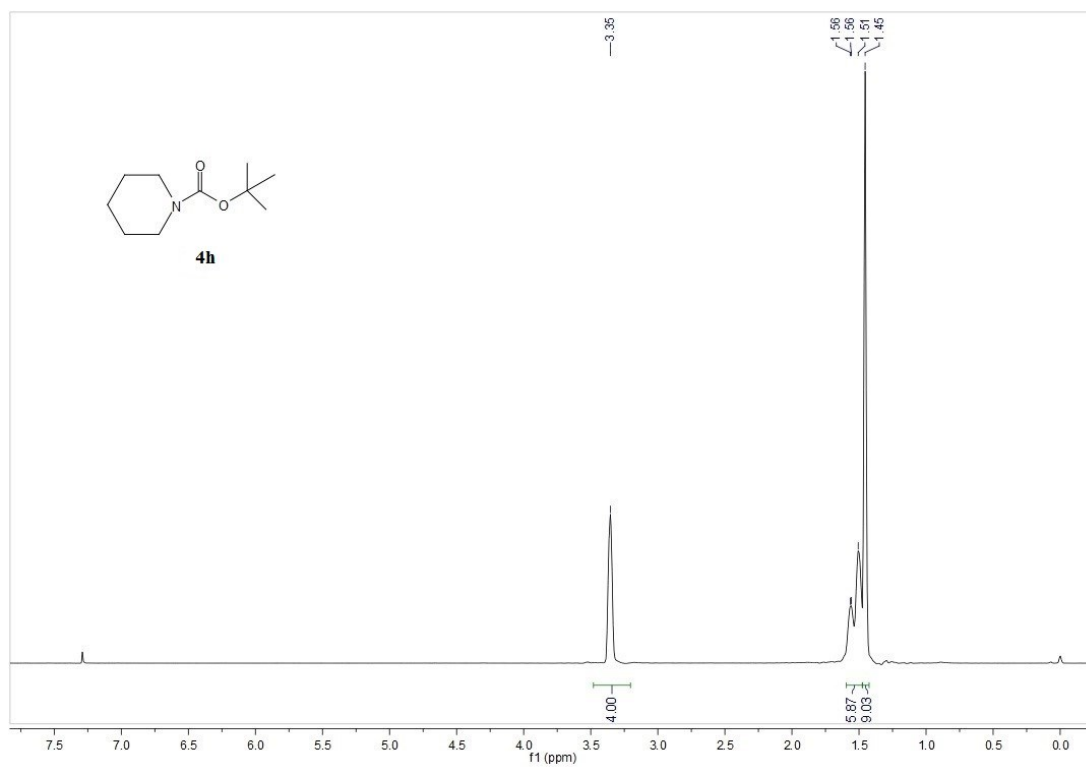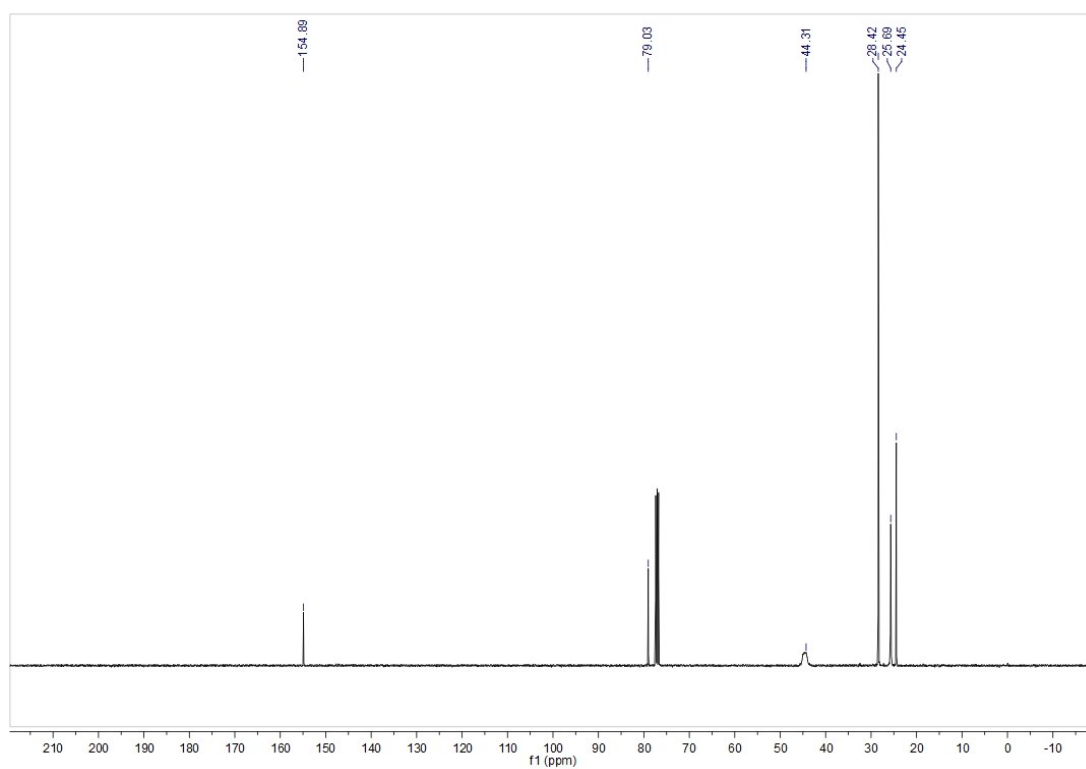

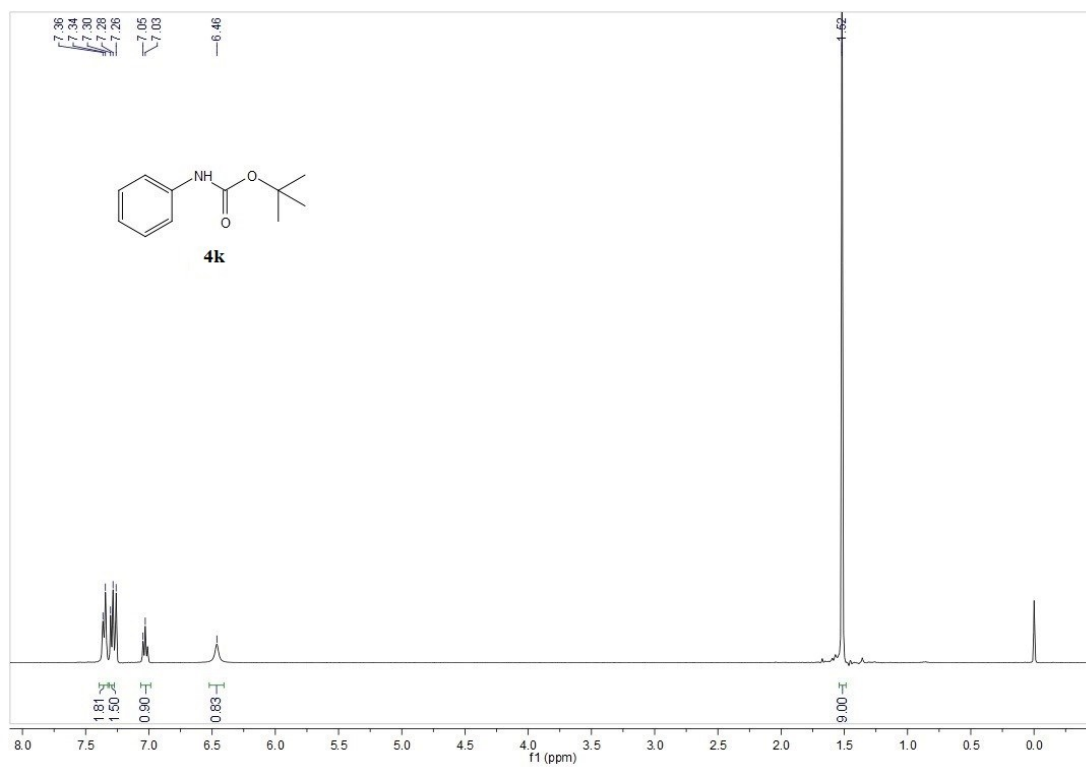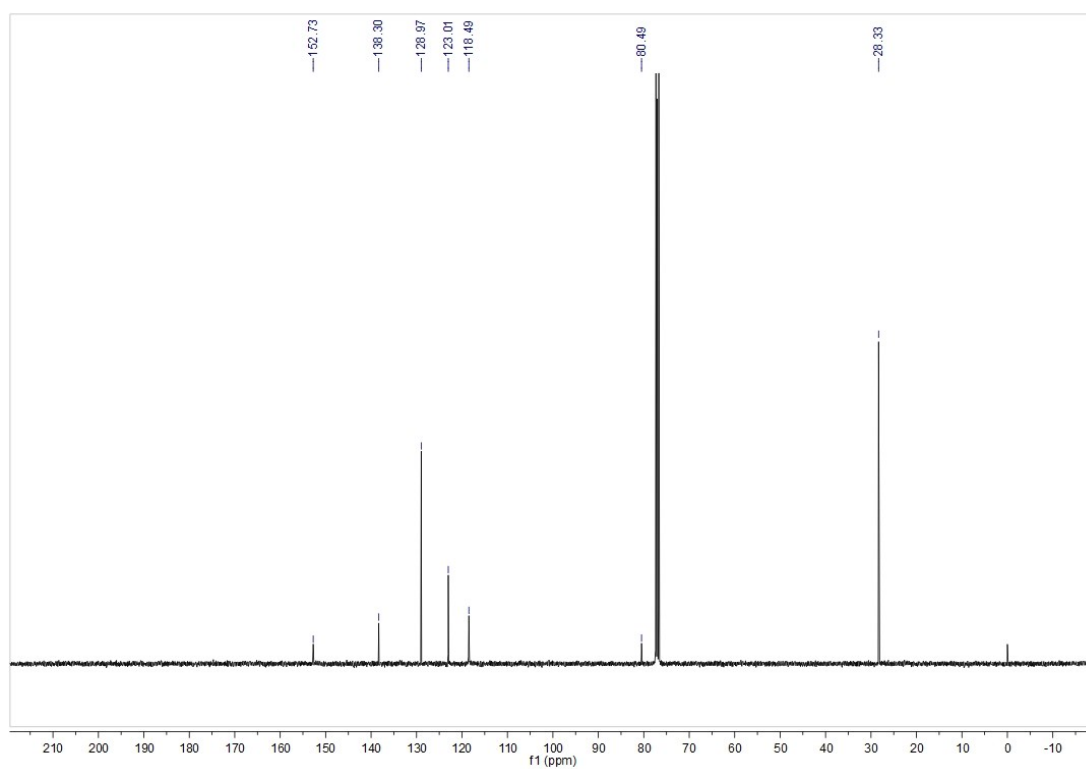

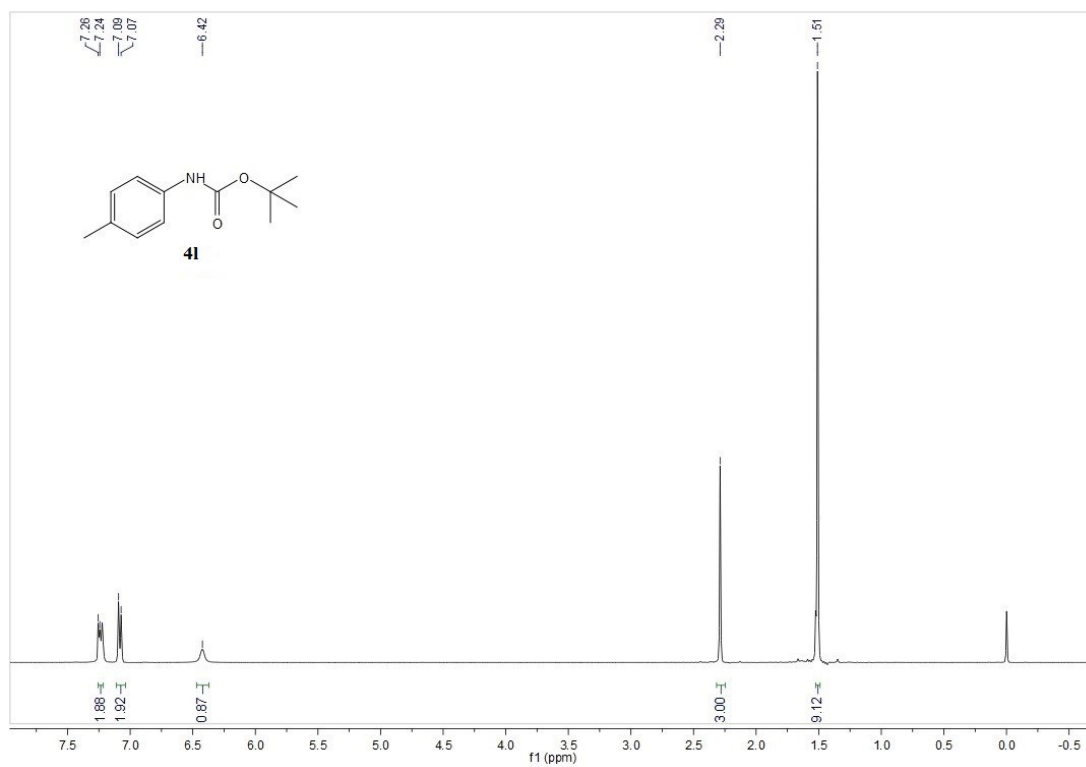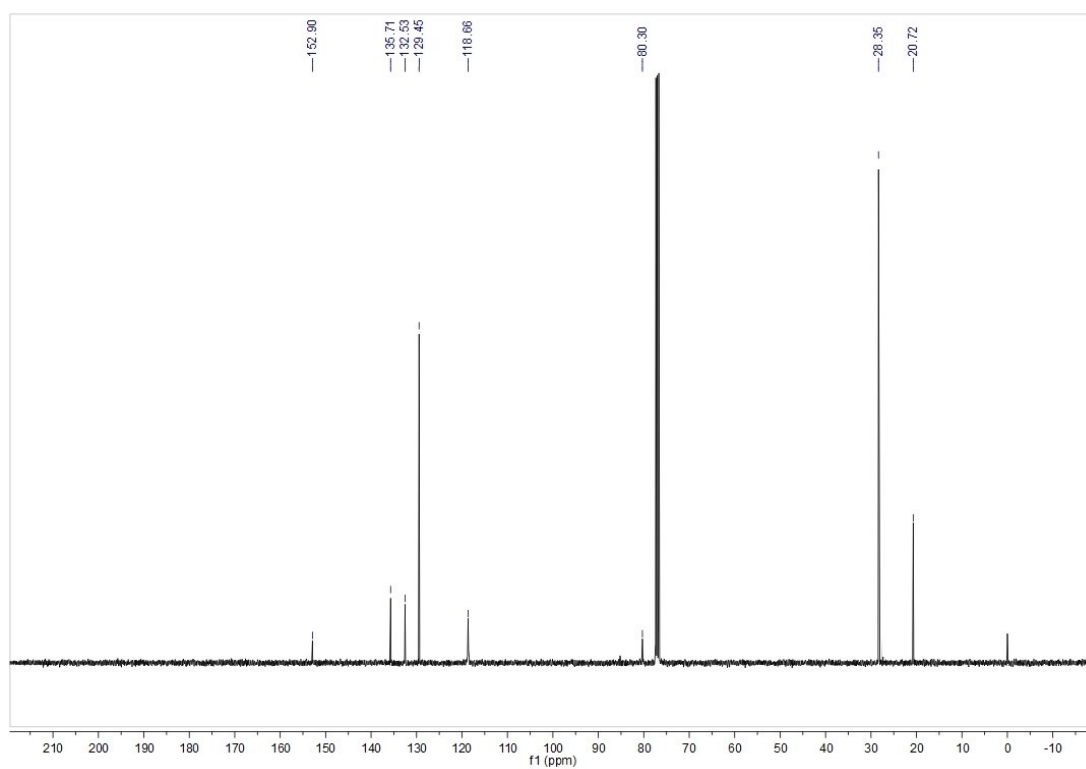

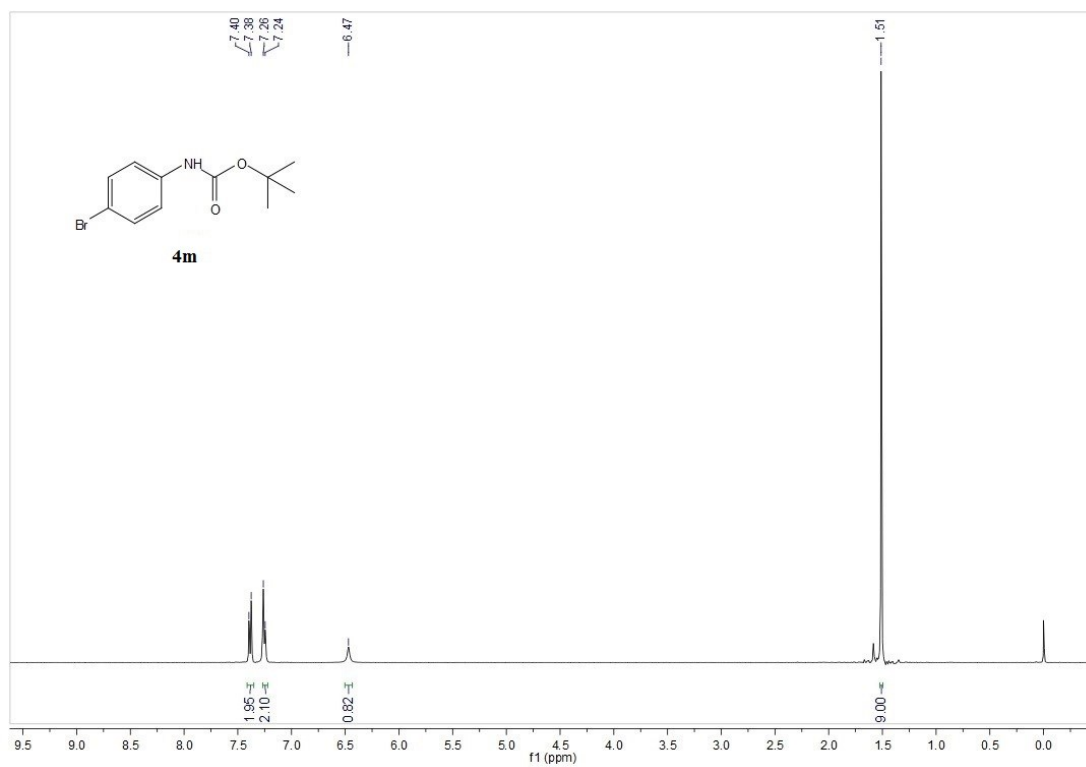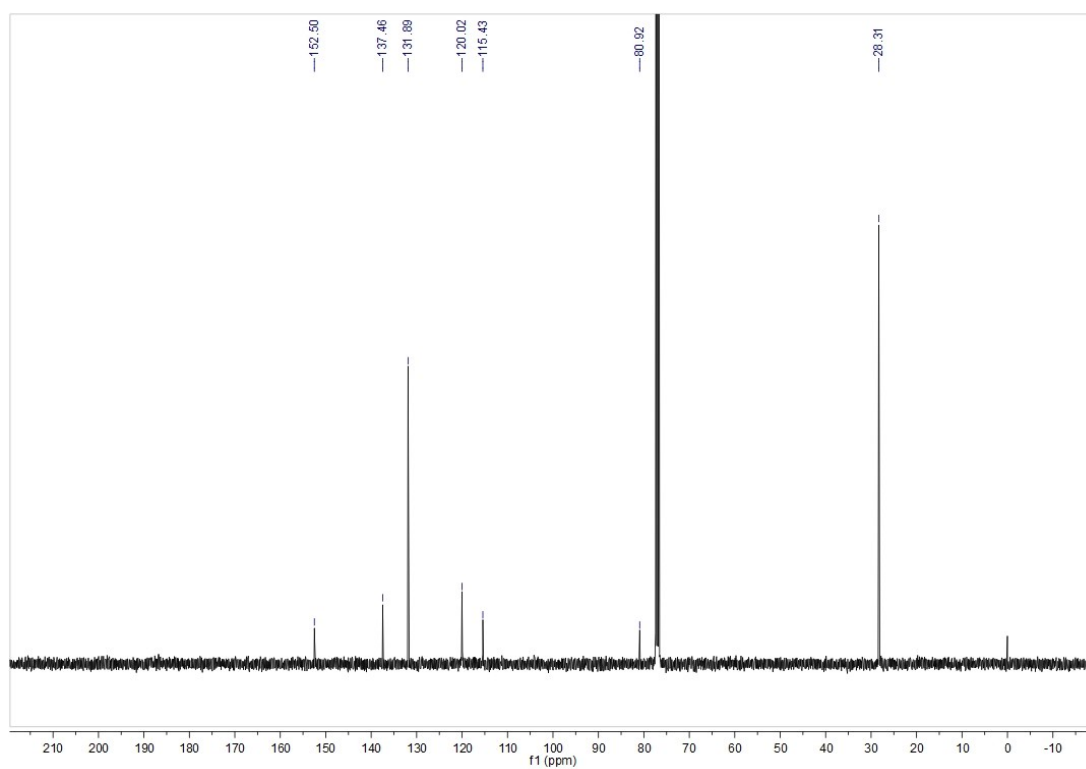

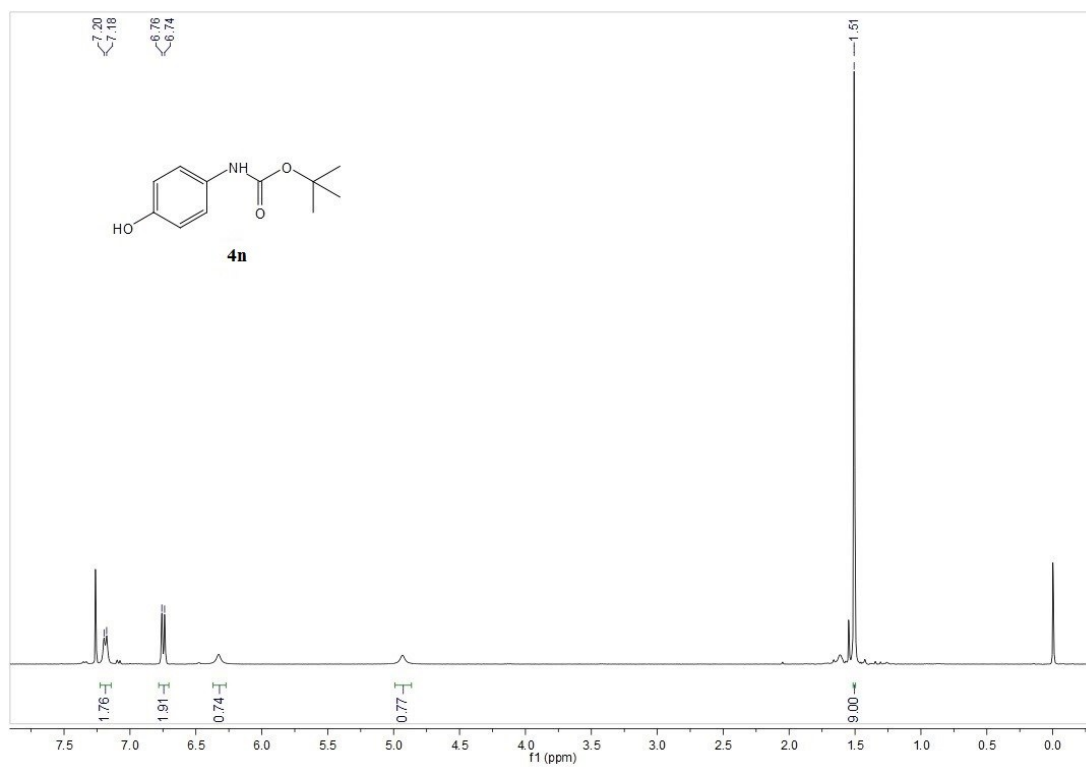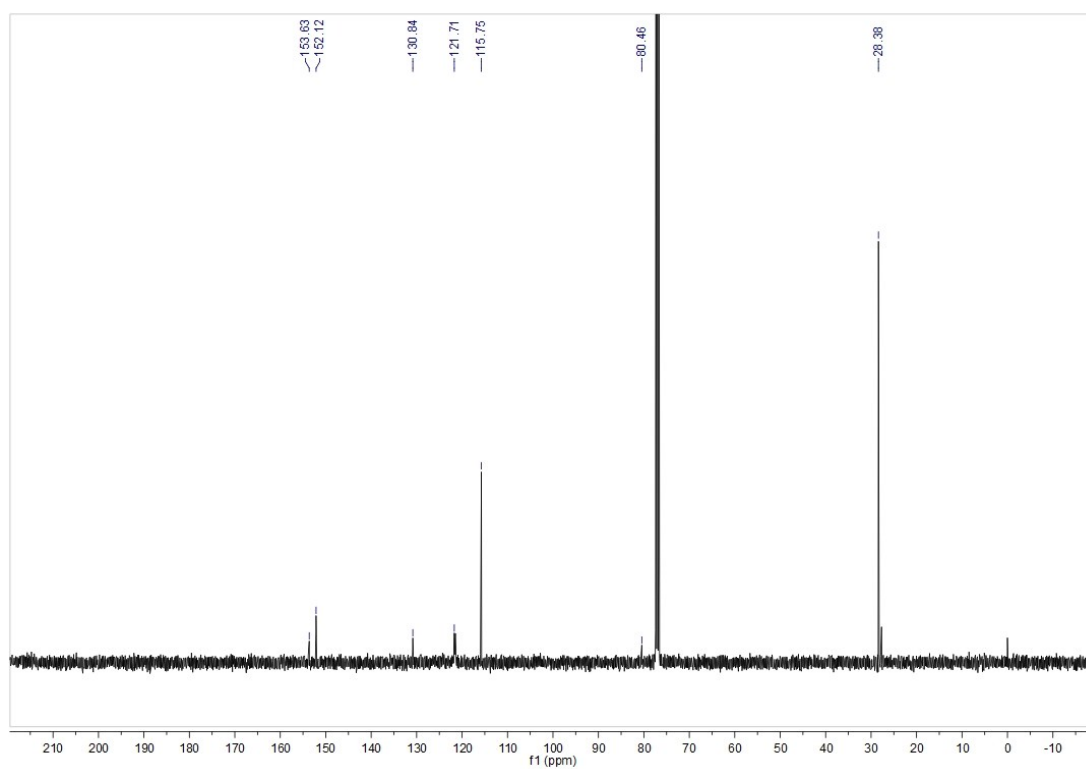



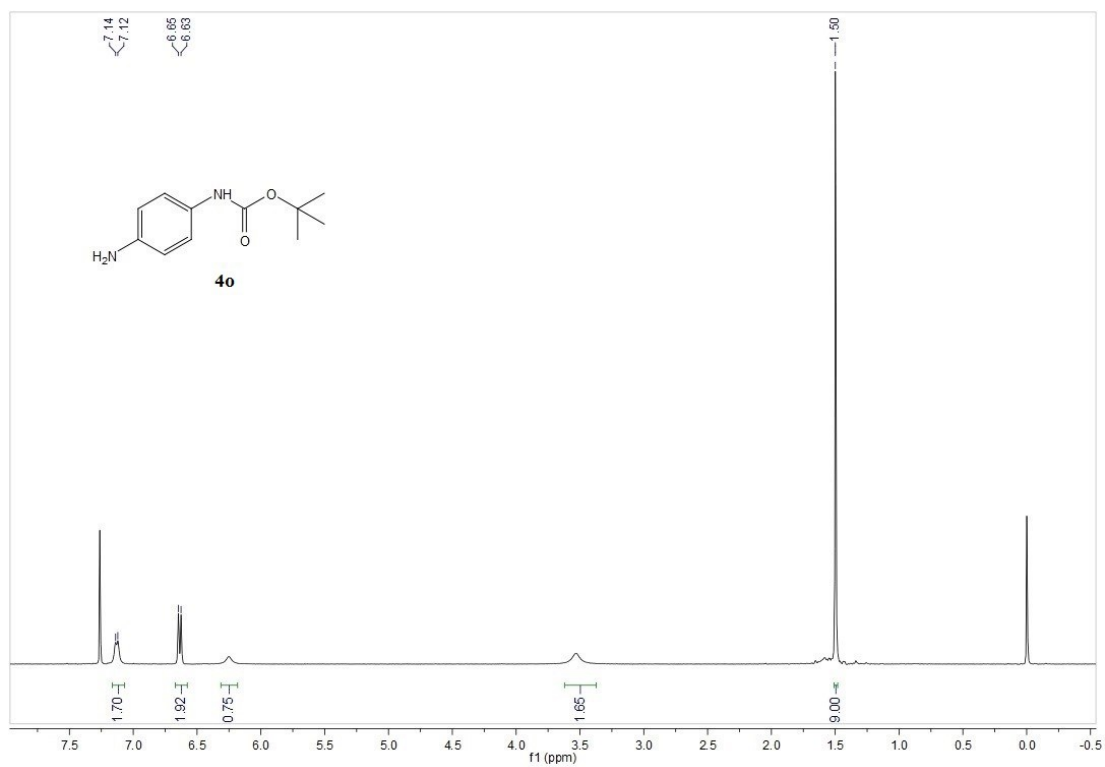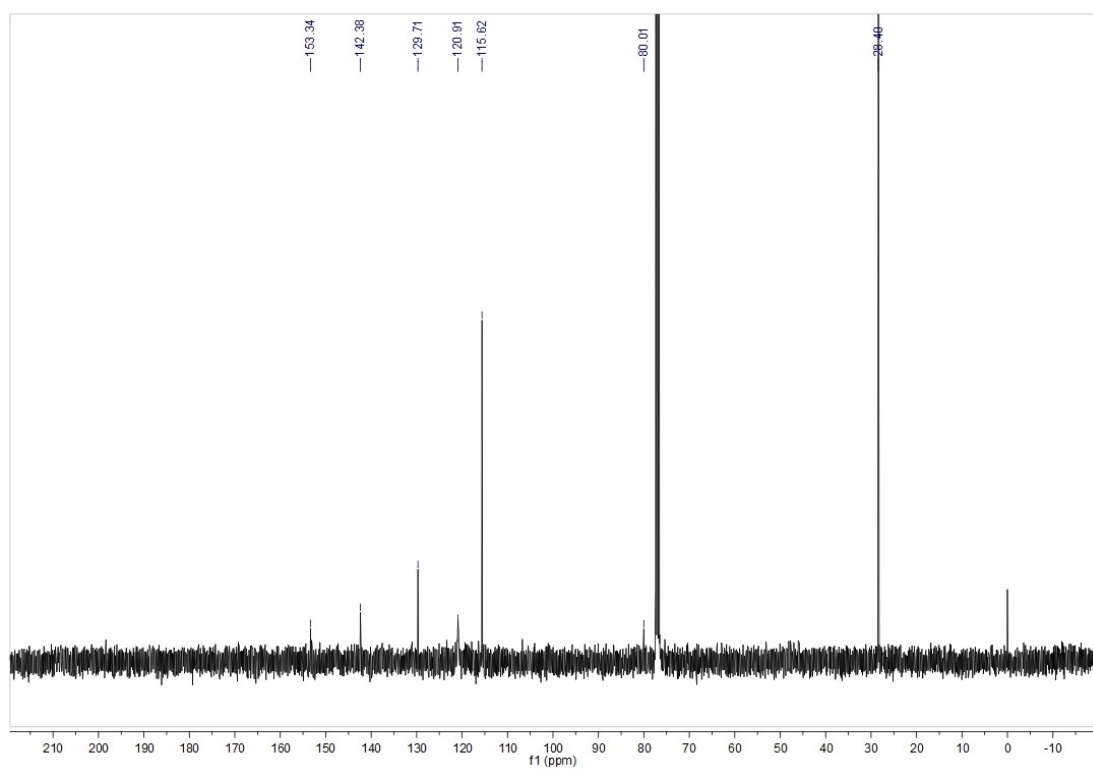

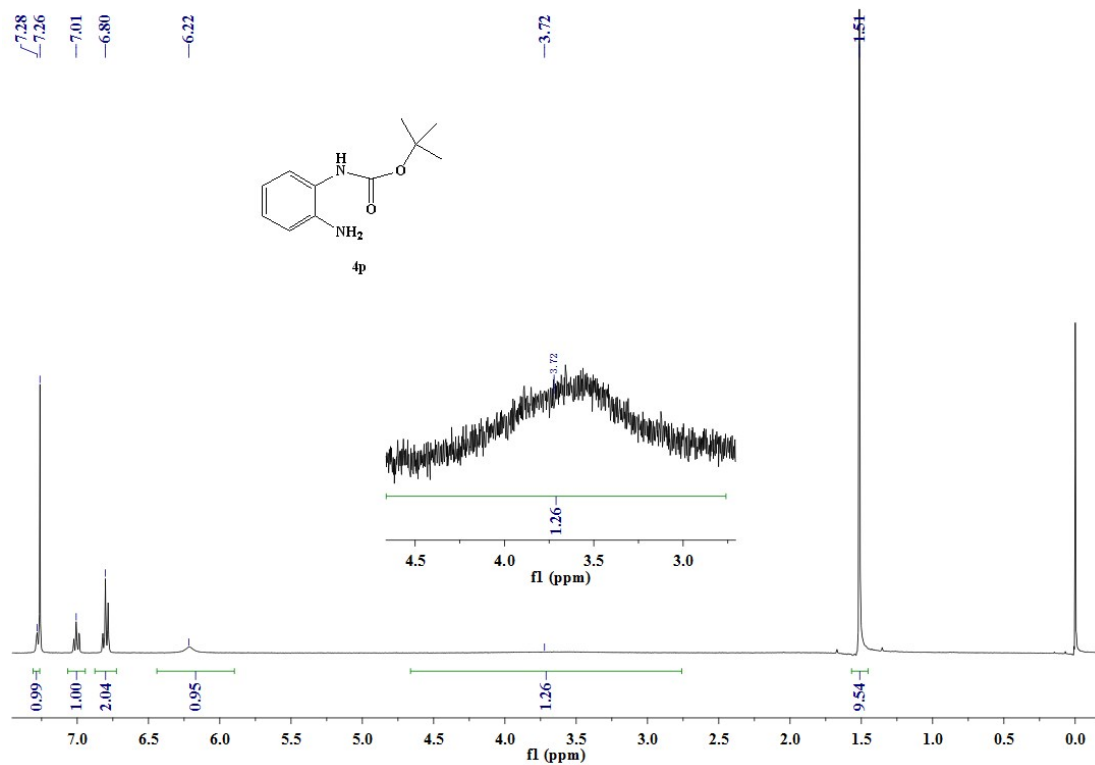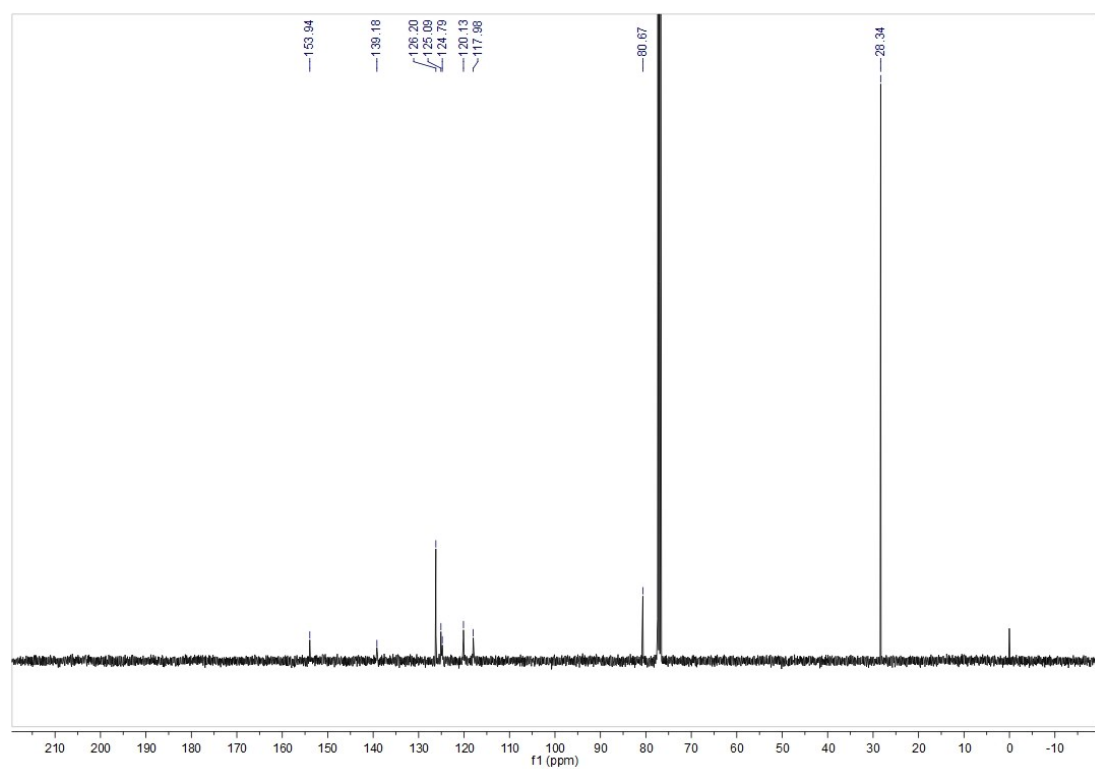

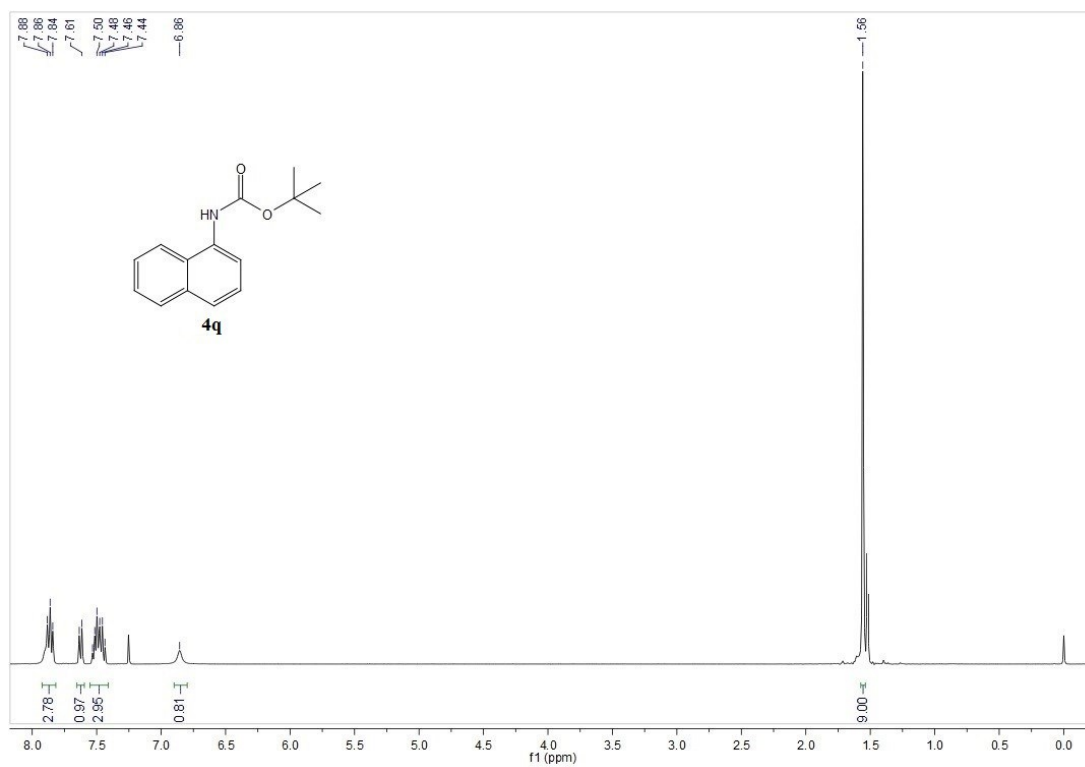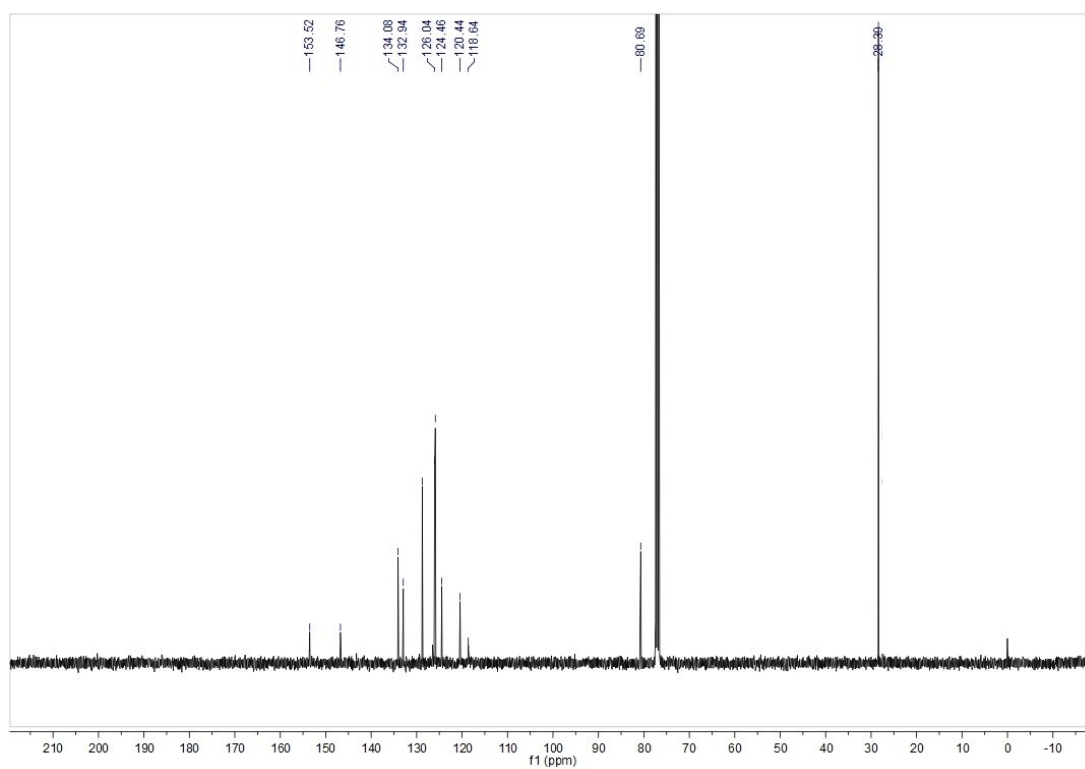

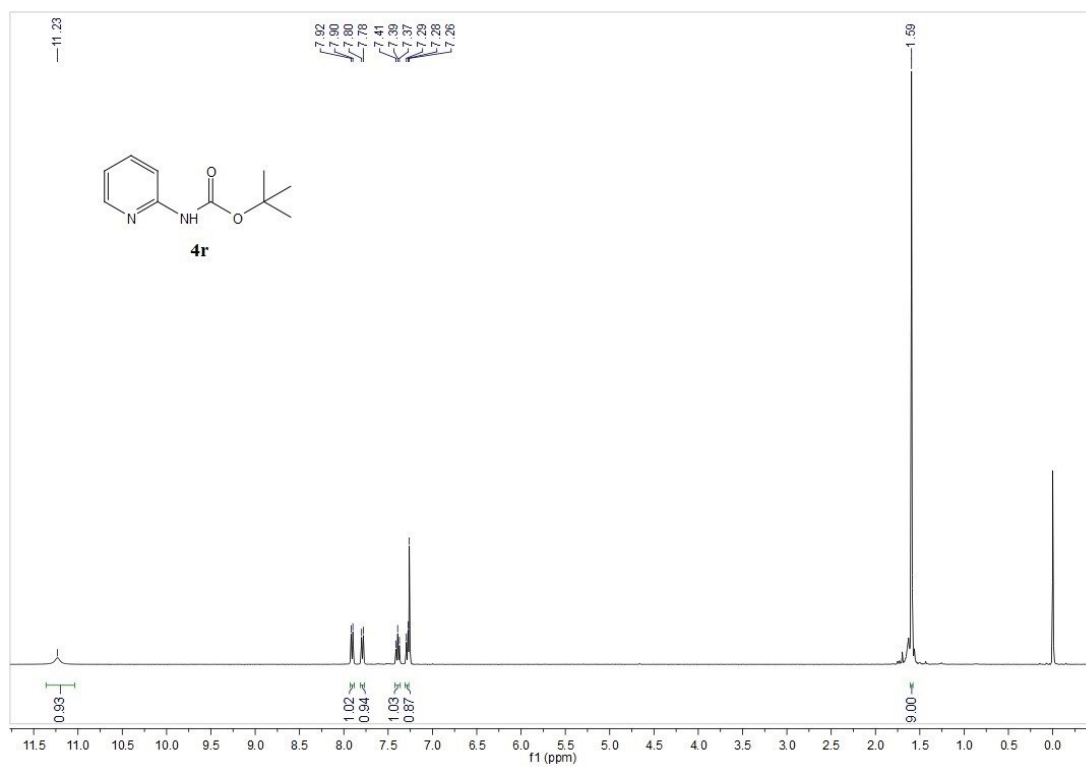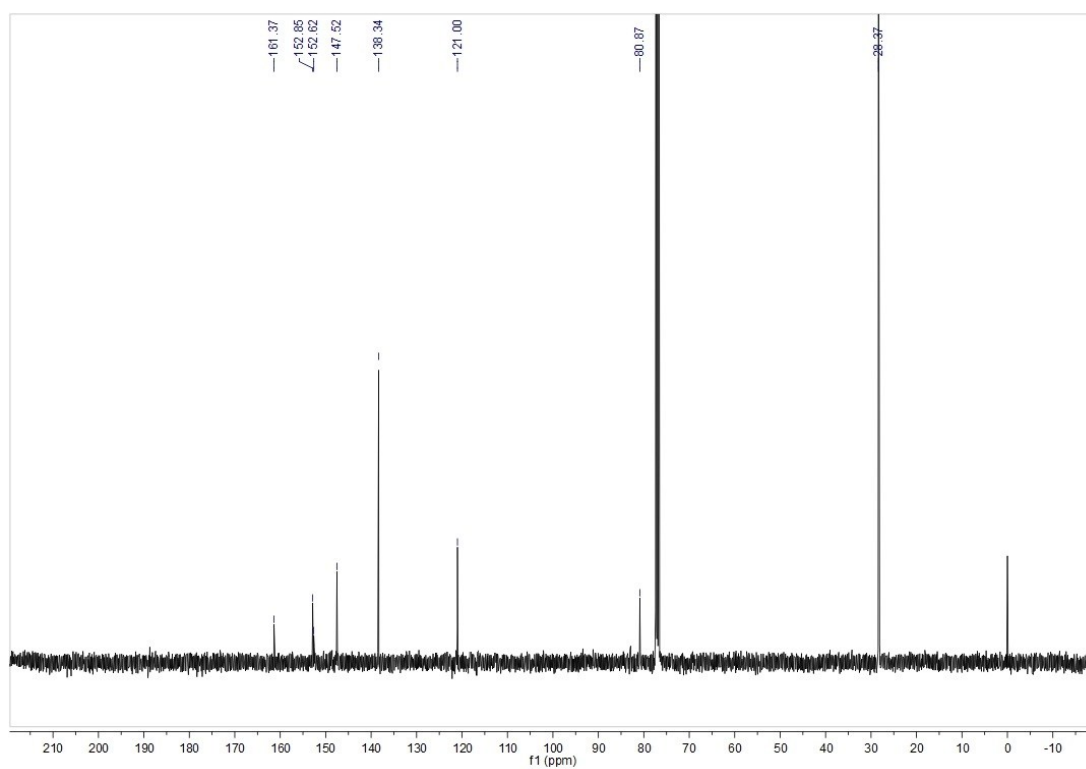

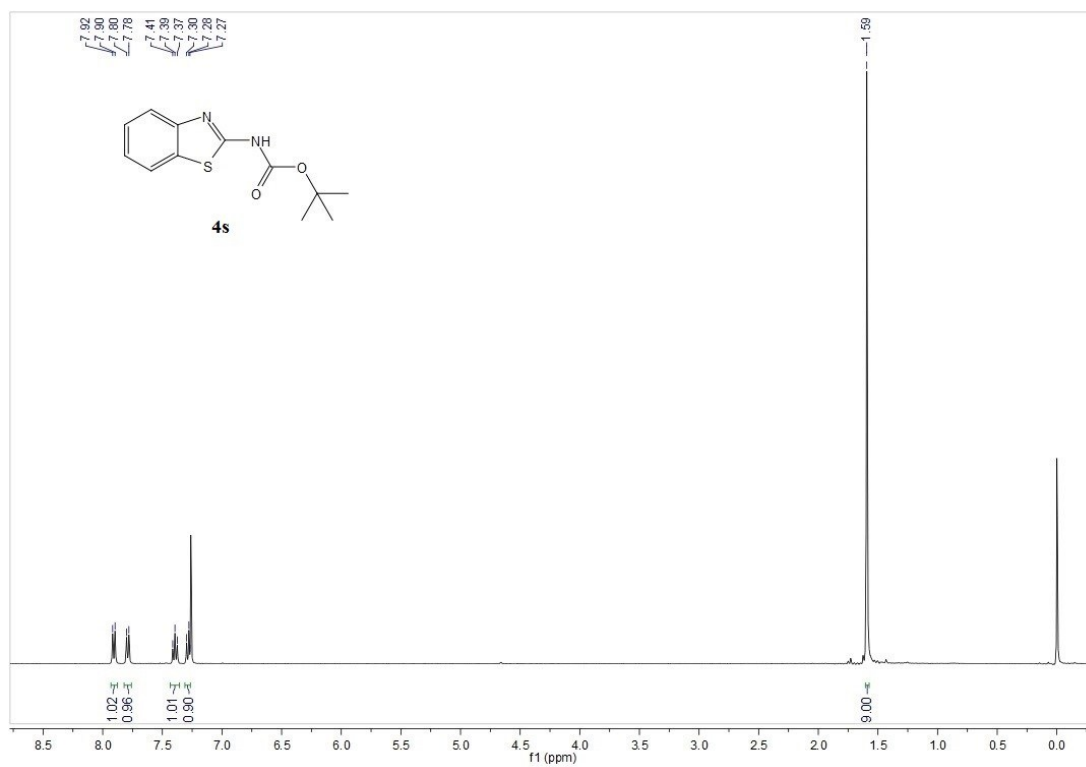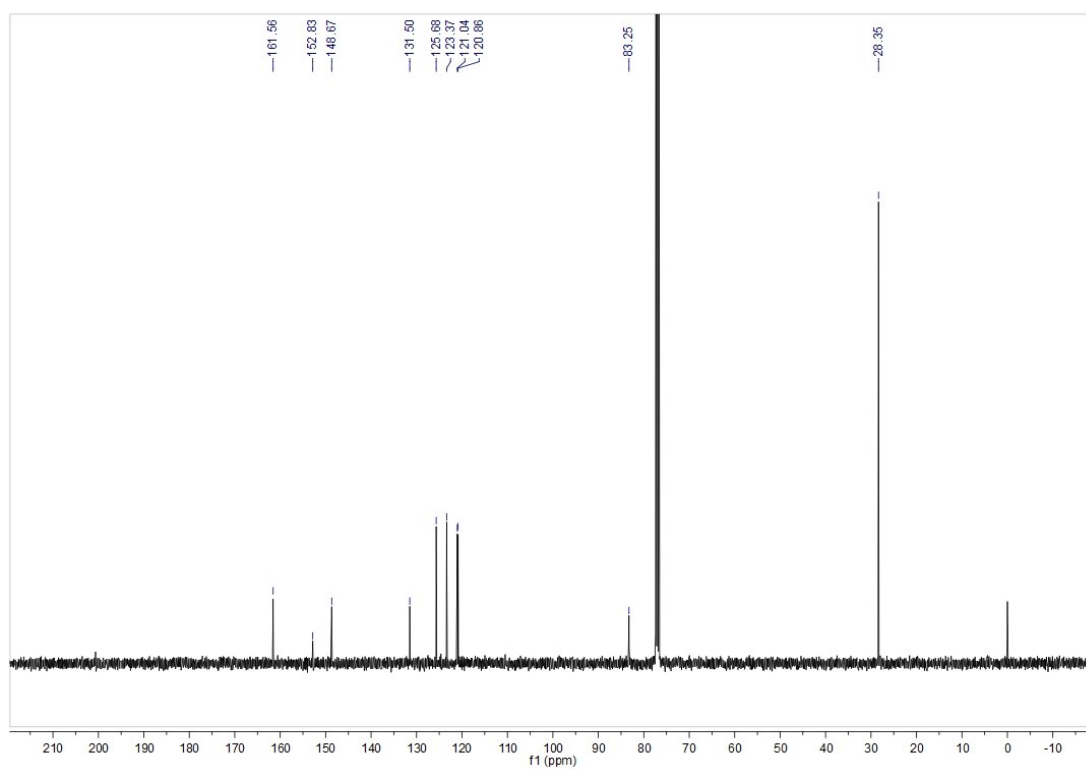

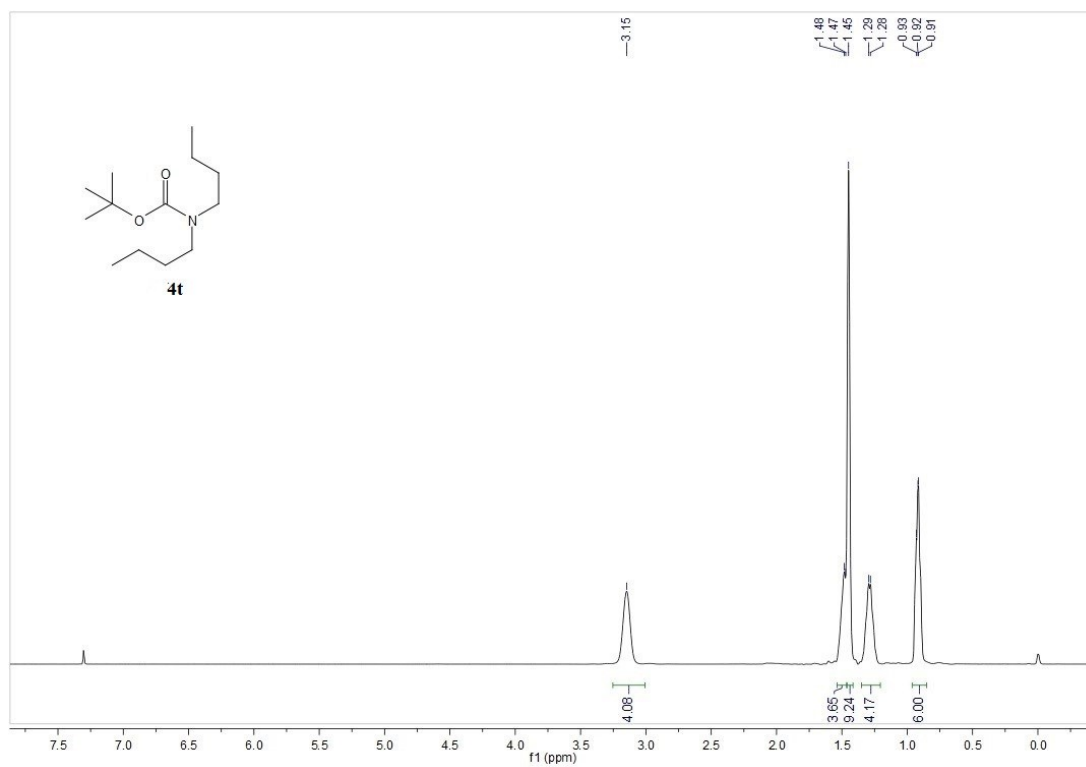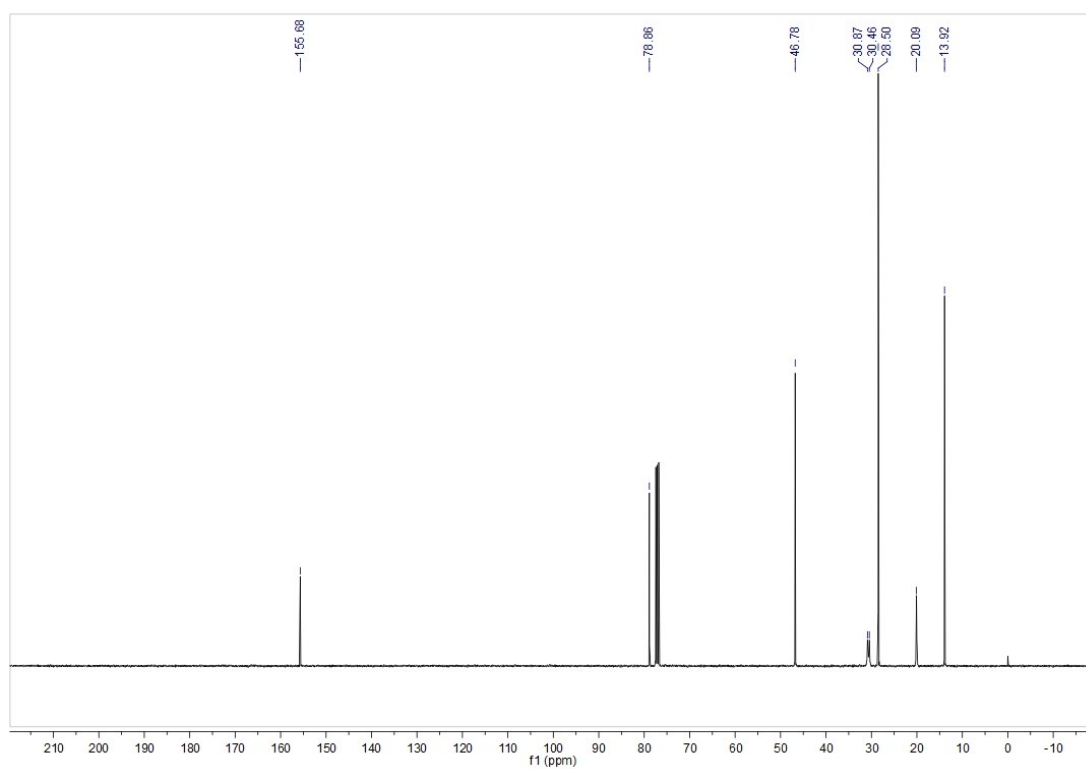

Supplement: c6ra15160d1.pdf [file c6ra15160d1.pdf]
